# Supplementary material for: Carboxylation of terminal alkynes with CO2using novel silver N-heterocyclic carbene complexes
Source: Royal Society of Chemistry journal article supplement (doi:10.1039/c6dt01746k), 2016-01-01

**Carboxylation of terminal alkynes with CO<sub>2</sub> catalyzed by novel silver  
N-heterocyclic carbene complexes**

Shanshan Li,<sup>a</sup> Jing Sun,<sup>a</sup> Zhizhi Zhang,<sup>b</sup> Ruixia Xie,<sup>a</sup> Xiangchen Fang <sup>b\*</sup> and  
Mingdong Zhou <sup>a\*</sup>

<sup>a</sup> School of Chemistry and Materials Science, Liaoning Shihua University, Dandong  
Road 1, Fushun 113001, China. E-mail: mingdong.zhou@lnpu.edu.cn.

<sup>b</sup> Fushun Research Institute of Petroleum and Petrochemicals, Sinopec Group, Fushun  
113001, China. E-mail: fangxiangchen.fshy@sinopec.com.

**Electronic Supplementary Information**

**Table S1.** Crystal data and refinement parameters for complex I and II

|                                                          | <b>Complex I</b>                                                               | <b>Complex II</b>                                                  |
|----------------------------------------------------------|--------------------------------------------------------------------------------|--------------------------------------------------------------------|
| Empirical Formula                                        | C <sub>38</sub> H <sub>40</sub> Ag <sub>2</sub> Cl <sub>2</sub> N <sub>4</sub> | C <sub>19</sub> H <sub>20</sub> AgCl N <sub>2</sub> O <sub>2</sub> |
| Formula weight                                           | 839.38                                                                         | 451.69                                                             |
| Temperature (K)                                          | 193(2)                                                                         | 296(2)                                                             |
| Wavelength (Å)                                           | 0.71073                                                                        | 0.71073                                                            |
| Crystal system                                           | Monoclinic                                                                     | Monoclinic                                                         |
| Space group                                              | P21/c                                                                          | P21/n                                                              |
| a (Å)                                                    | 9.992(5)                                                                       | 14.281(3)                                                          |
| b (Å)                                                    | 8.977(4)                                                                       | 8.041(2)                                                           |
| c (Å)                                                    | 19.725(9)                                                                      | 17.283(4)                                                          |
| α (°)                                                    | 90                                                                             | 90                                                                 |
| β (°)                                                    | 91.261(9)                                                                      | 107.309(4)                                                         |
| γ (°)                                                    | 90                                                                             | 90                                                                 |
| Volume (Å <sup>3</sup> )                                 | 1768.9(14)                                                                     | 1894.8(8)                                                          |
| Z                                                        | 2                                                                              | 4                                                                  |
| Calculated density (mg/m <sup>3</sup> )                  | 1.576                                                                          | 1.583                                                              |
| Absorption coefficient (mm <sup>-1</sup> )               | 1.291                                                                          | 1.219                                                              |
| F(000)                                                   | 848                                                                            | 912                                                                |
| Crystal size (mm <sup>3</sup> )                          | 0.130 x 0.050 x 0.040                                                          | 0.400 x 0.130 x 0.120                                              |
| θ Range (°)                                              | 1.03-26.56                                                                     | 1.630-27.253                                                       |
| Index ranges                                             | -12 ≤ h ≤ 12, -10 ≤ k ≤ 11, -24 ≤ l ≤ 20                                       | -17 ≤ h ≤ 18, -9 ≤ k ≤ 10, -22 ≤ l ≤ 19                            |
| Reflections collected                                    | 10996                                                                          | 12999                                                              |
| Independent reflections, R <sub>int</sub>                | 3434, 0.0658                                                                   | 4199, 0.0318                                                       |
| Refinement method                                        | Full-matrix least-squares on F <sup>2</sup>                                    | Full-matrix least-squares on F <sup>2</sup>                        |
| Data / restraints / parameters                           | 3576 / 0 / 211                                                                 | 4199 / 0 / 228                                                     |
| Goodness-of-fit on F <sup>2</sup>                        | 1.141                                                                          | 1.051                                                              |
| R [I > 2σ(I)]                                            | 0.1047, 0.2673                                                                 | 0.0314, 0.0886                                                     |
| R indices (all data)                                     | 0.1477, 0.2929                                                                 | 0.0469, 0.0961                                                     |
| Largest difference in peak and hole (e Å <sup>-3</sup> ) | 3.095 and -1.200                                                               | 0.553 and -0.615                                                   |

**Table S2.** Crystal data and refinement parameters for complex **III** and **IV**.

|                                                          | <b>Complex III</b>                                                             | <b>Complex IV</b>                                                 |
|----------------------------------------------------------|--------------------------------------------------------------------------------|-------------------------------------------------------------------|
| Empirical Formula                                        | C <sub>34</sub> H <sub>28</sub> Ag <sub>2</sub> Cl <sub>6</sub> N <sub>4</sub> | C <sub>19</sub> H <sub>20</sub> AgClN <sub>2</sub> O <sub>2</sub> |
| Formula weight                                           | 921.04                                                                         | 451.69                                                            |
| Temperature (K)                                          | 293(2)                                                                         | 203(2)                                                            |
| Wavelength (Å)                                           | 0.71073                                                                        | 0.71073                                                           |
| Crystal system                                           | Monoclinic                                                                     | Monoclinic                                                        |
| Space group                                              | P21/c                                                                          | P21/c                                                             |
| a (Å)                                                    | 9.757(3)                                                                       | 15.9786(19)                                                       |
| b (Å)                                                    | 9.169(3)                                                                       | 7.8790(9)                                                         |
| c (Å)                                                    | 19.300(5)                                                                      | 15.8991(18)                                                       |
| α (°)                                                    | 90                                                                             | 90                                                                |
| β (°)                                                    | 91.390(4)                                                                      | 114.739(2)                                                        |
| γ (°)                                                    | 90                                                                             | 90                                                                |
| Volume (Å <sup>3</sup> )                                 | 1726.2(8)                                                                      | 1817.9(4)                                                         |
| Z                                                        | 2                                                                              | 4                                                                 |
| Calculated density (mg/m <sup>3</sup> )                  | 1.772                                                                          | 1.650                                                             |
| Absorption coefficient (mm <sup>-1</sup> )               | 1.631                                                                          | 1.270                                                             |
| F(000)                                                   | 912                                                                            | 912                                                               |
| Crystal size (mm <sup>3</sup> )                          | 0.200 x 0.080 x 0.060                                                          | 0.180 x 0.140 x 0.040                                             |
| θ Range (°)                                              | 2.088-25.998                                                                   | 2.572-27.488                                                      |
| Index ranges                                             | -11 ≤ h ≤ 7, -10 ≤ k ≤ 11, -23 ≤ l ≤ 23                                        | -19 ≤ h ≤ 20, -10 ≤ k ≤ 9, -20 ≤ l ≤ 17                           |
| Reflections collected                                    | 7656                                                                           | 12663                                                             |
| Independent reflections, R <sub>int</sub>                | 3372, 0.0399                                                                   | 4129, 0.0306                                                      |
| Refinement method                                        | Full-matrix least-squares on F <sup>2</sup>                                    | Full-matrix least-squares on F <sup>2</sup>                       |
| Data / restraints / parameters                           | 3372 / 0 / 208                                                                 | 4129 / 0 / 228                                                    |
| Goodness-of-fit on F <sup>2</sup>                        | 0.942                                                                          | 1.165                                                             |
| R [I > 2σ(I)]                                            | 0.0410, 0.0970                                                                 | 0.0373, 0.1230                                                    |
| R indices (all data)                                     | 0.0792, 0.1245                                                                 | 0.0484, 0.1293                                                    |
| Largest difference in peak and hole (e Å <sup>-3</sup> ) | 0.628 and -0.560                                                               | 0.754 and -0.676                                                  |

# NMR spectra of I-IV

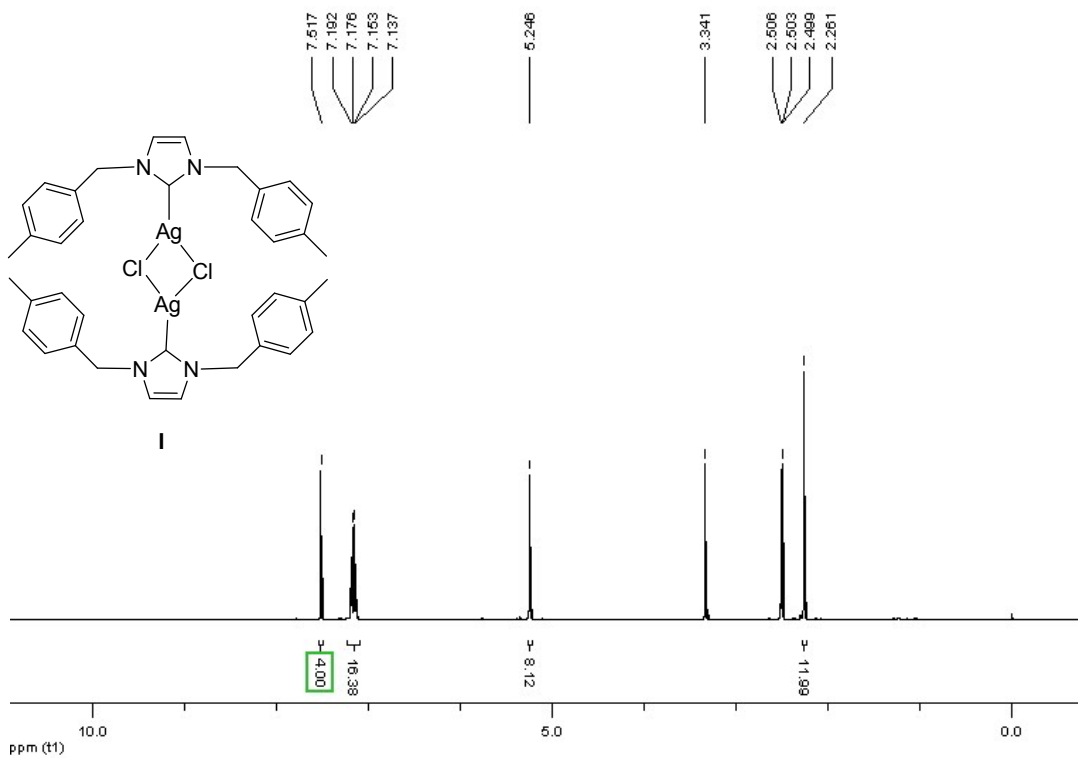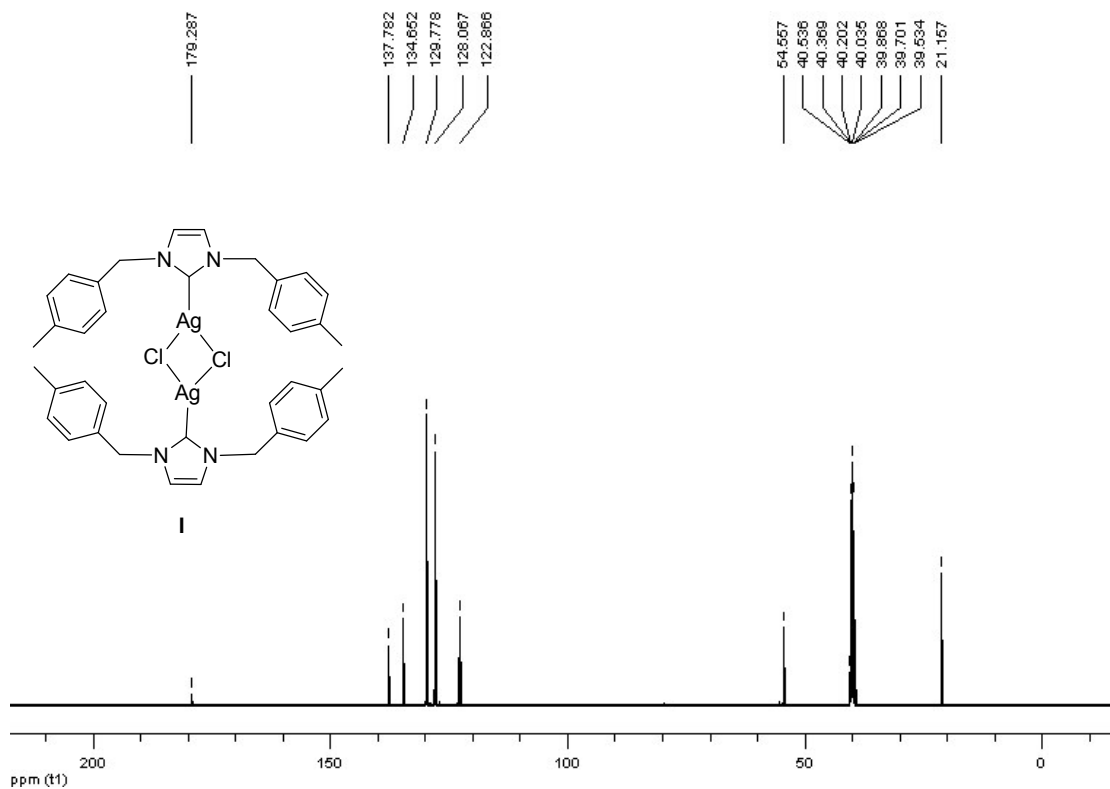

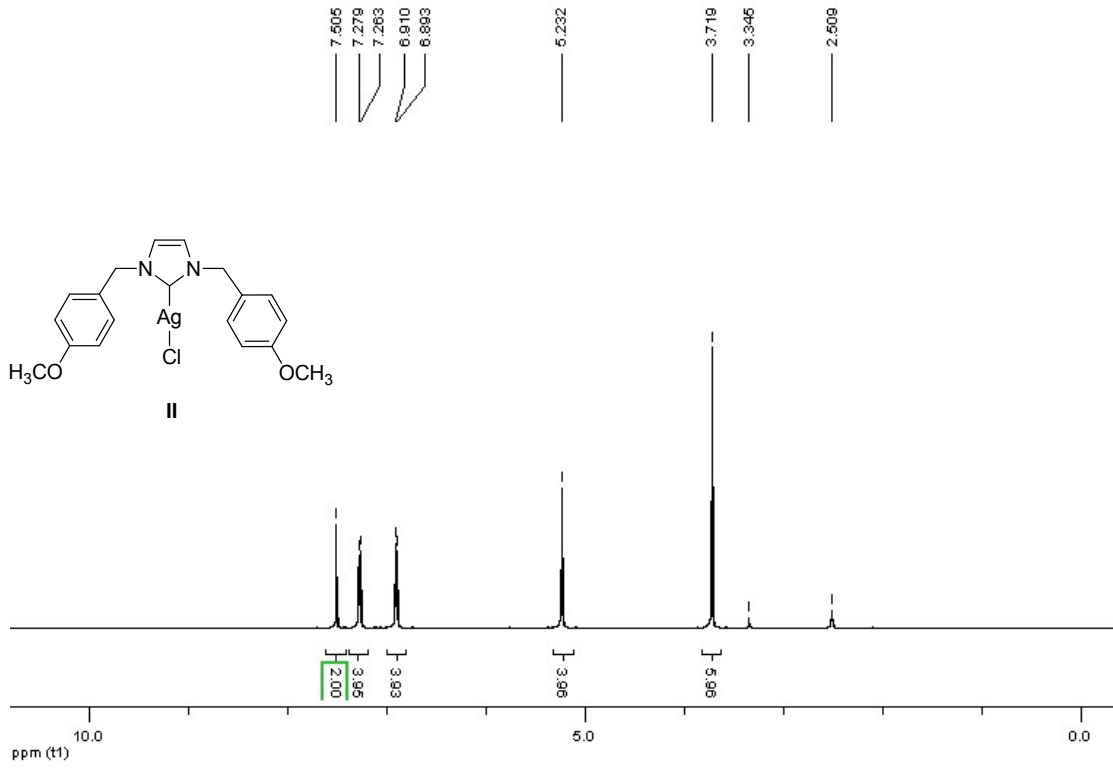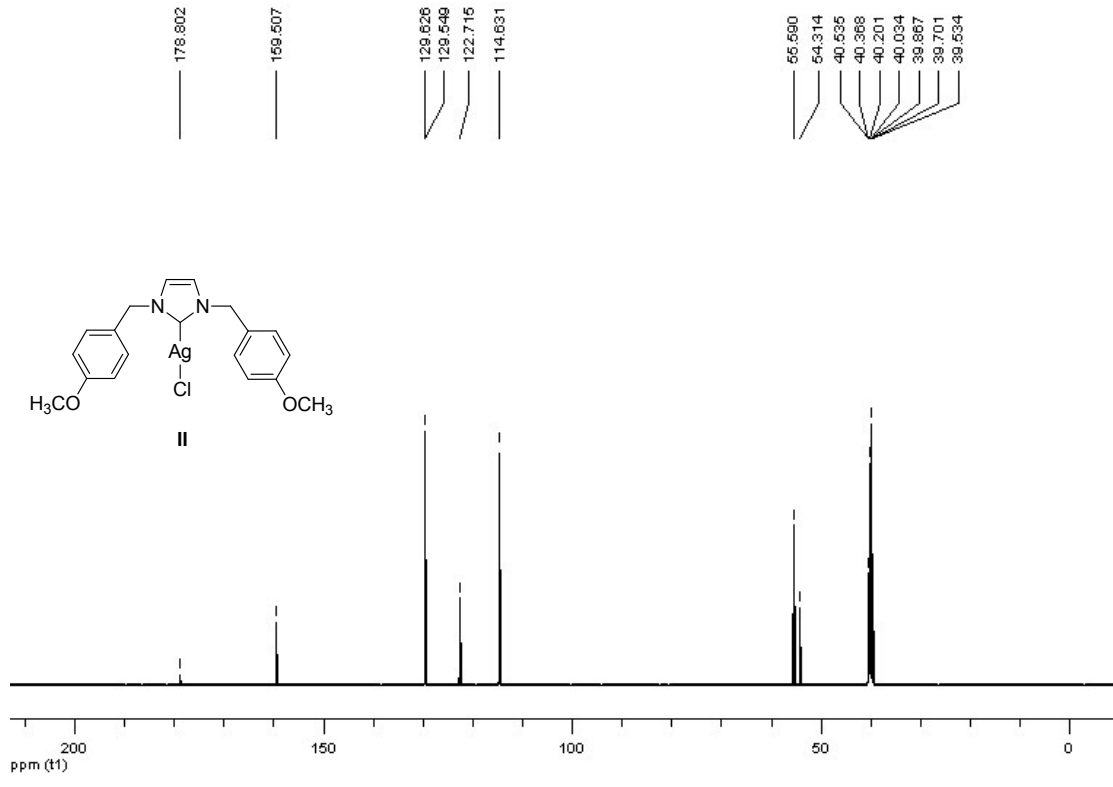

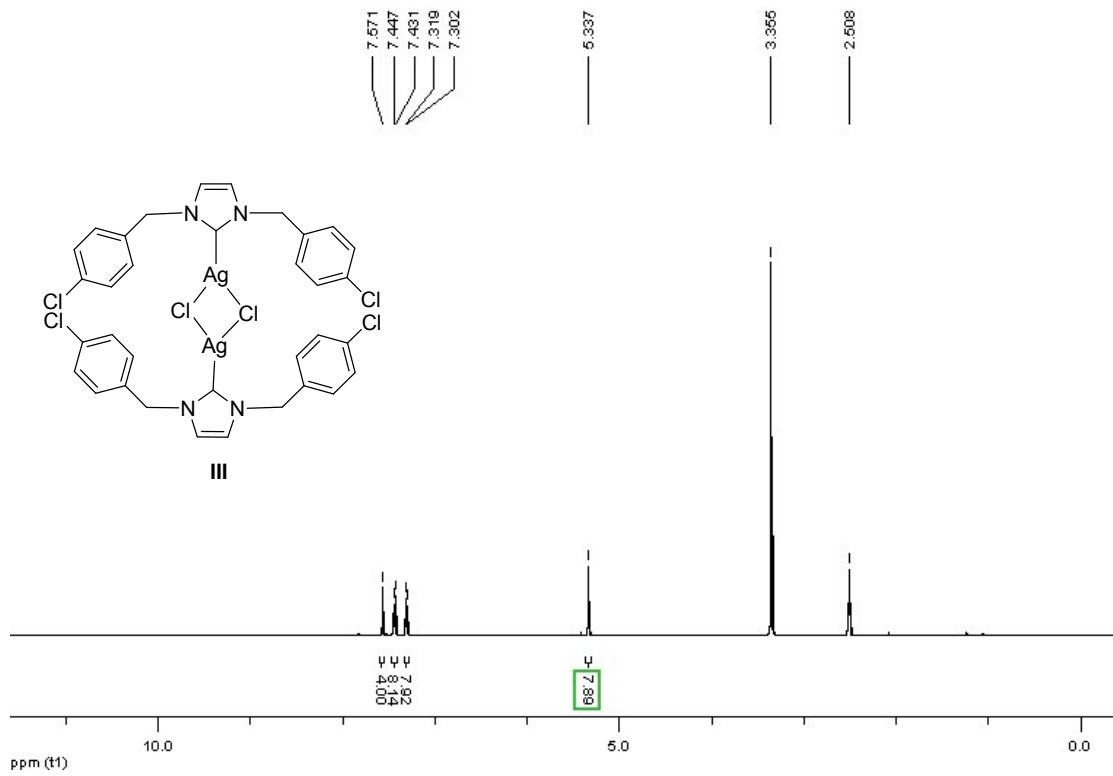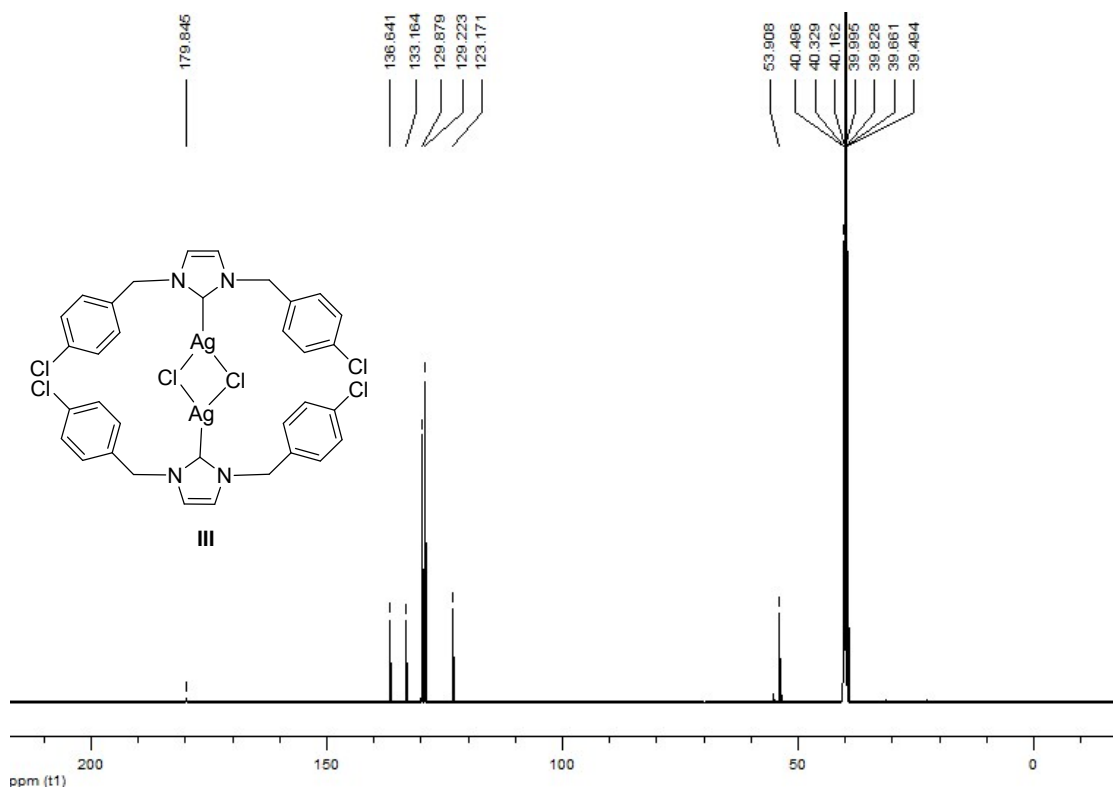

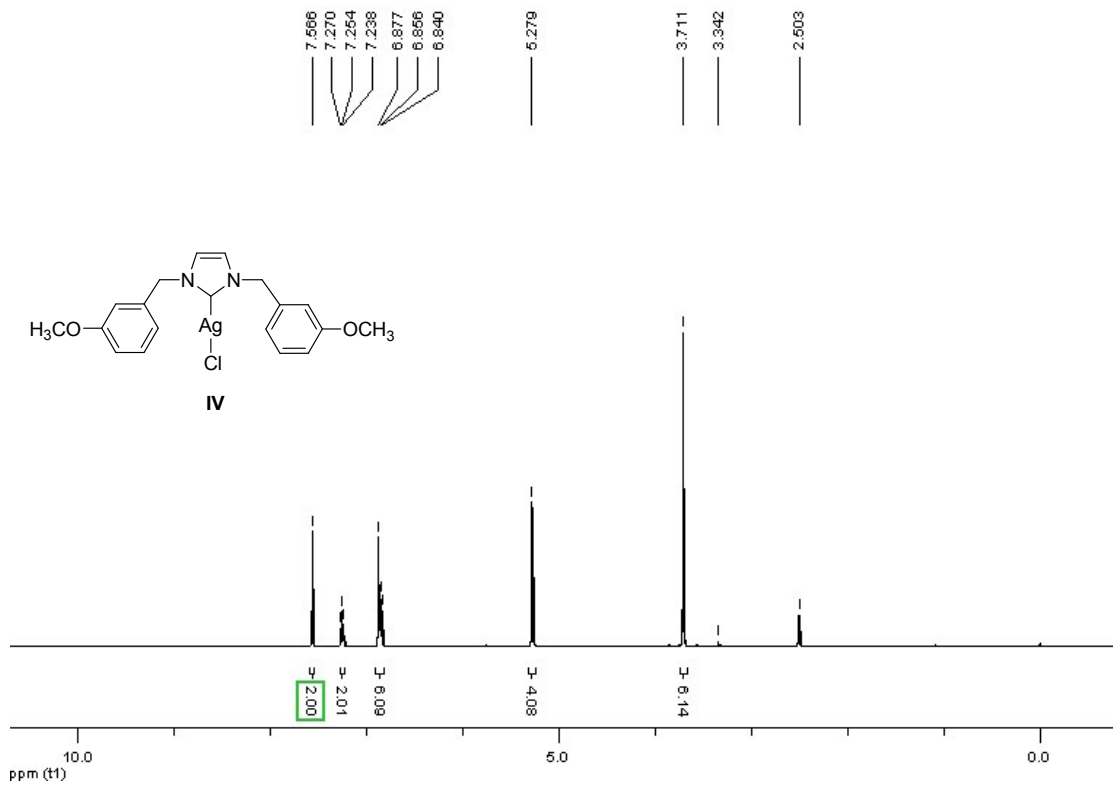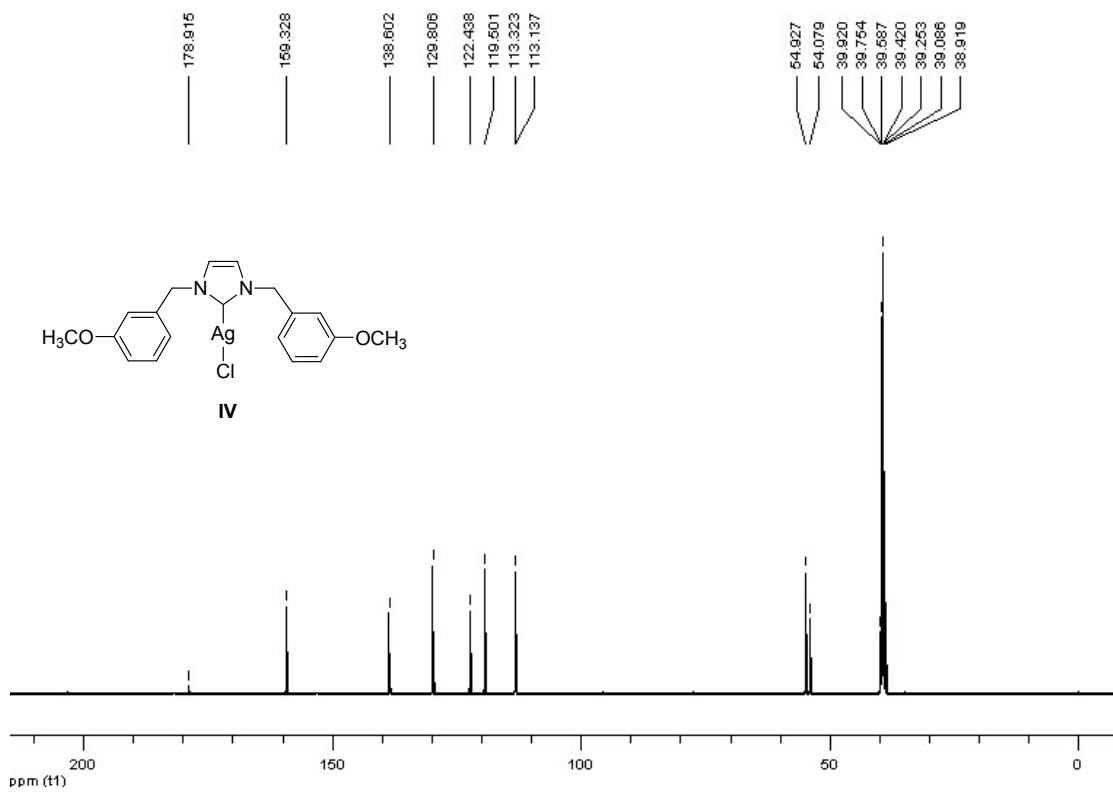

# NMR spectra of 2a-2t

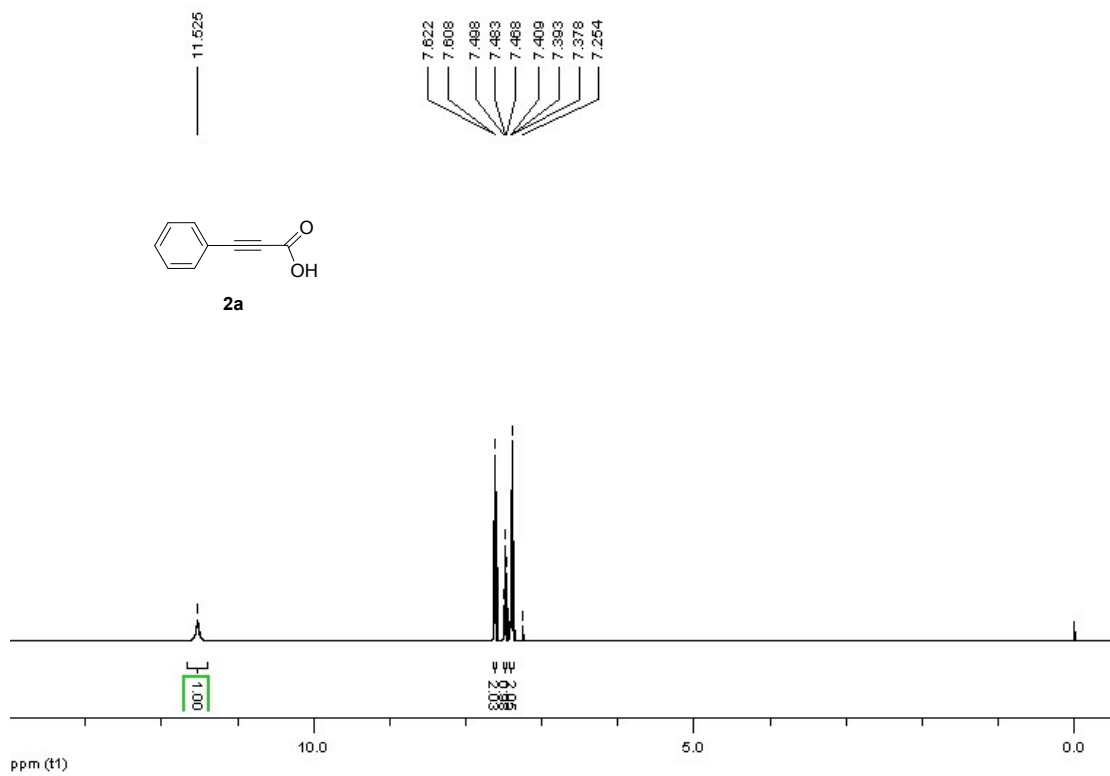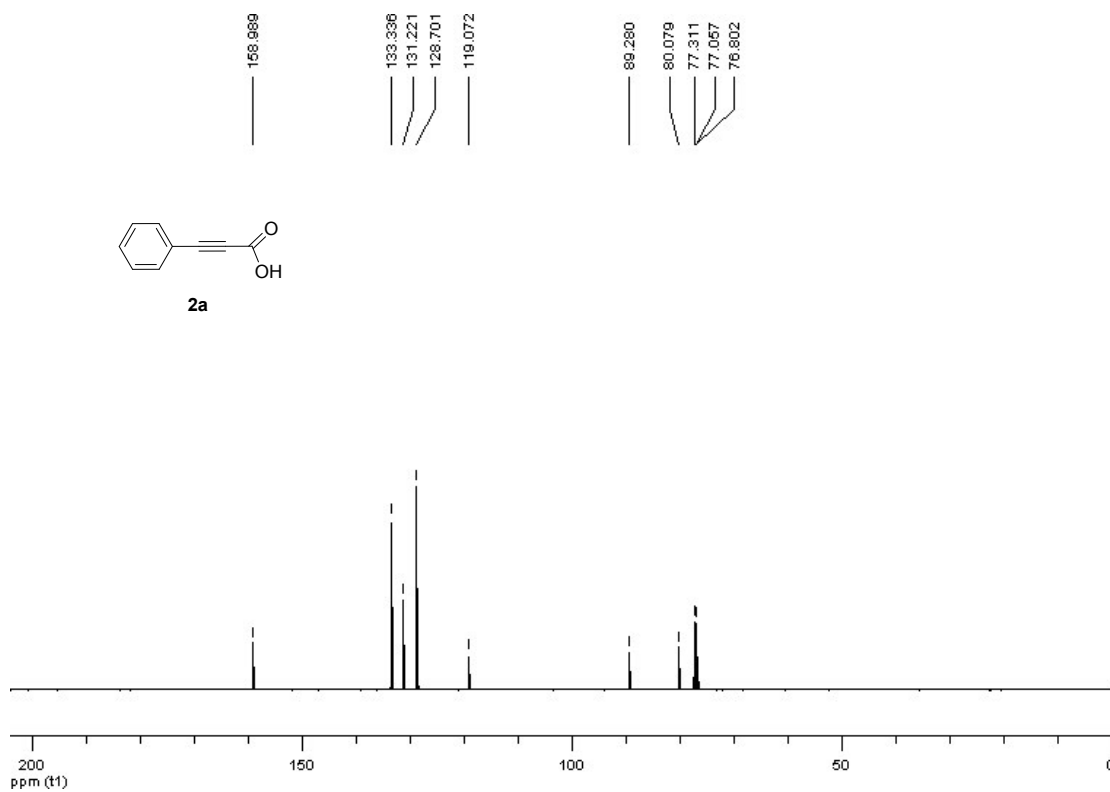



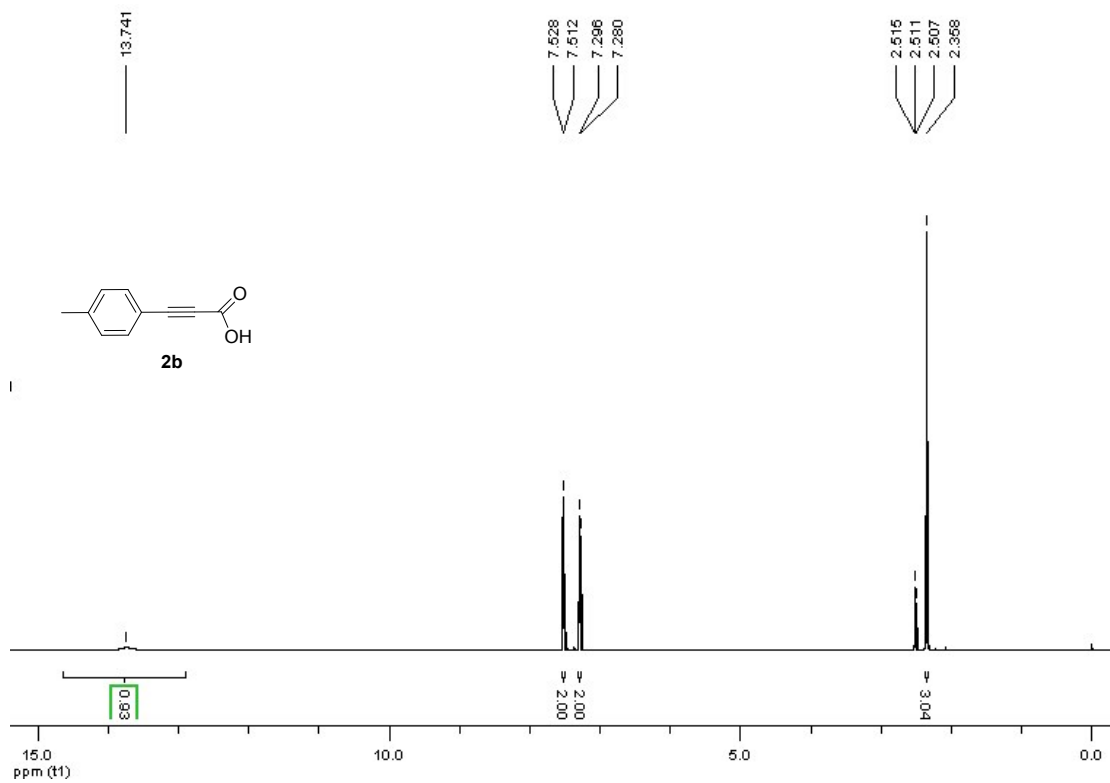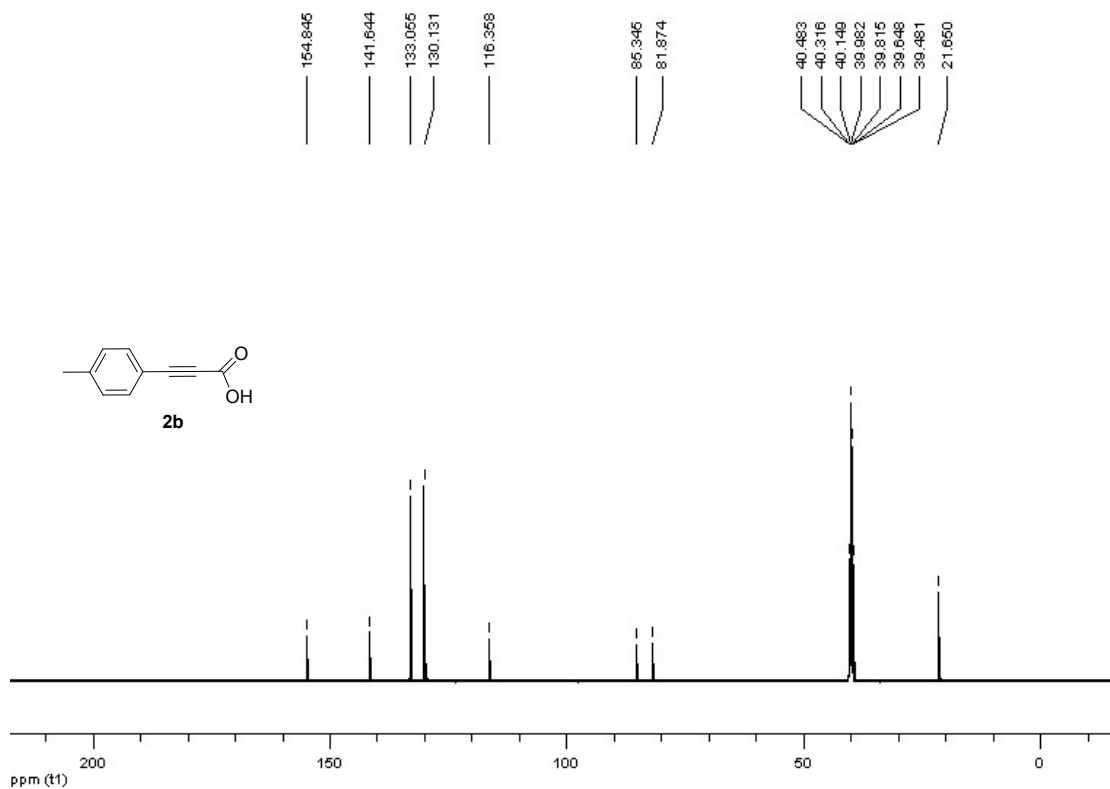

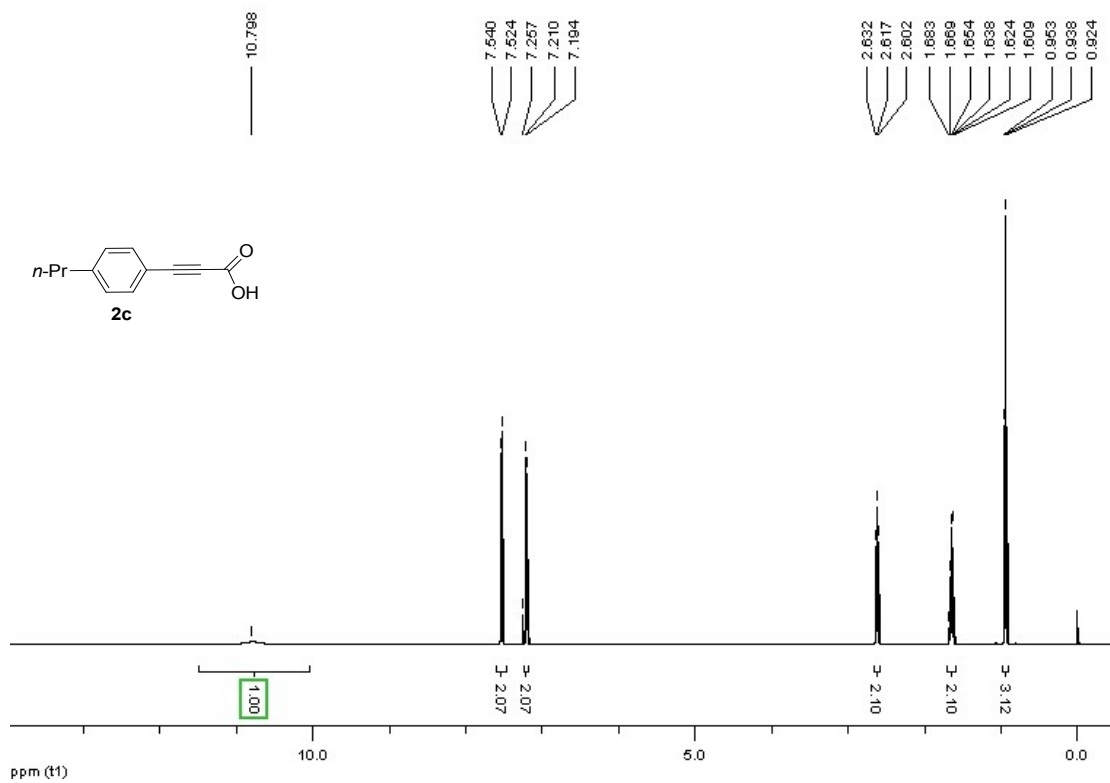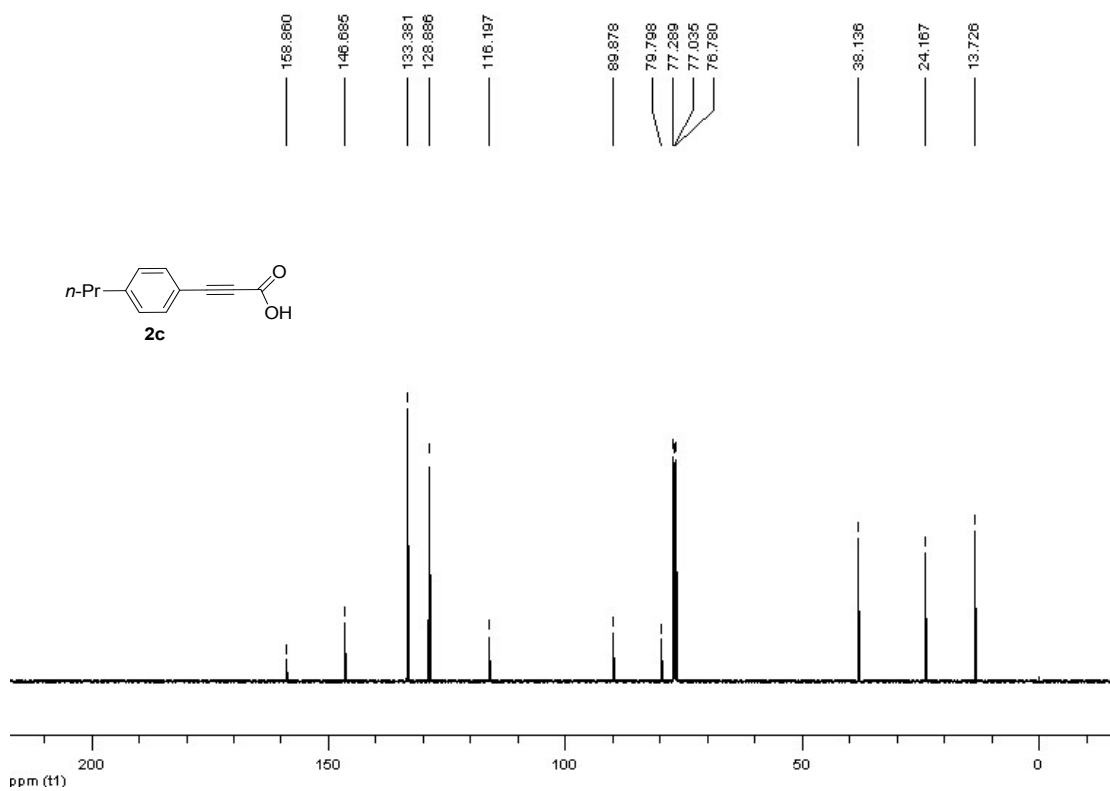

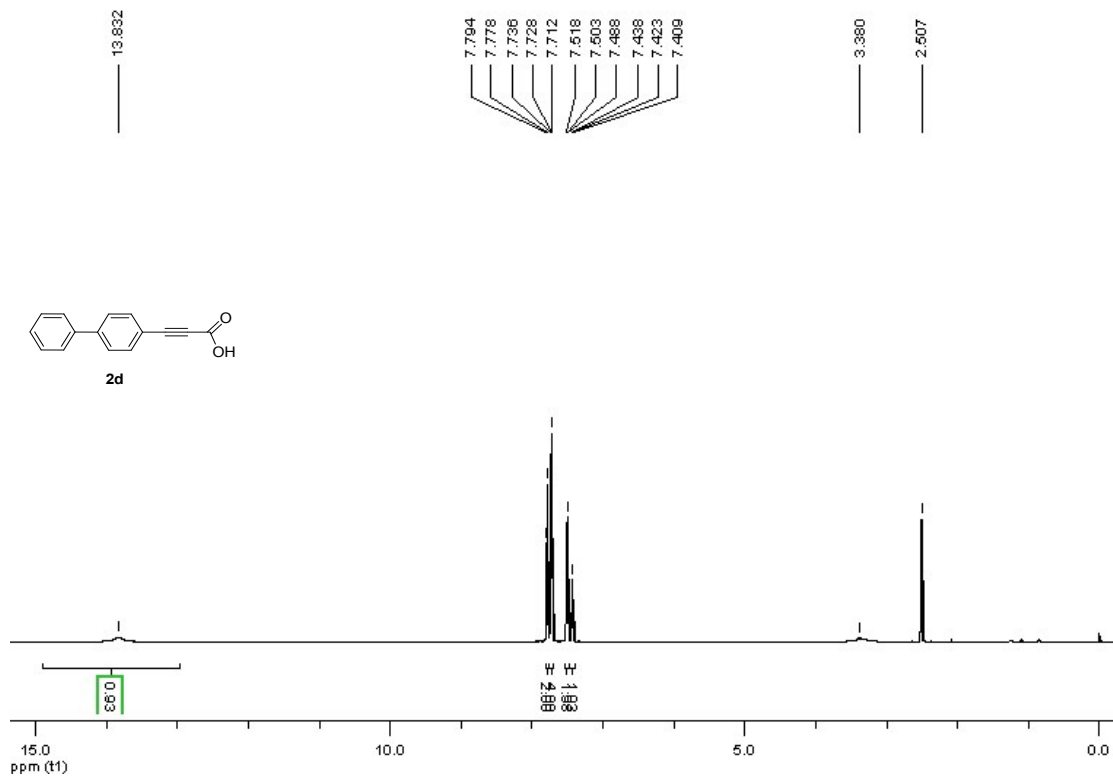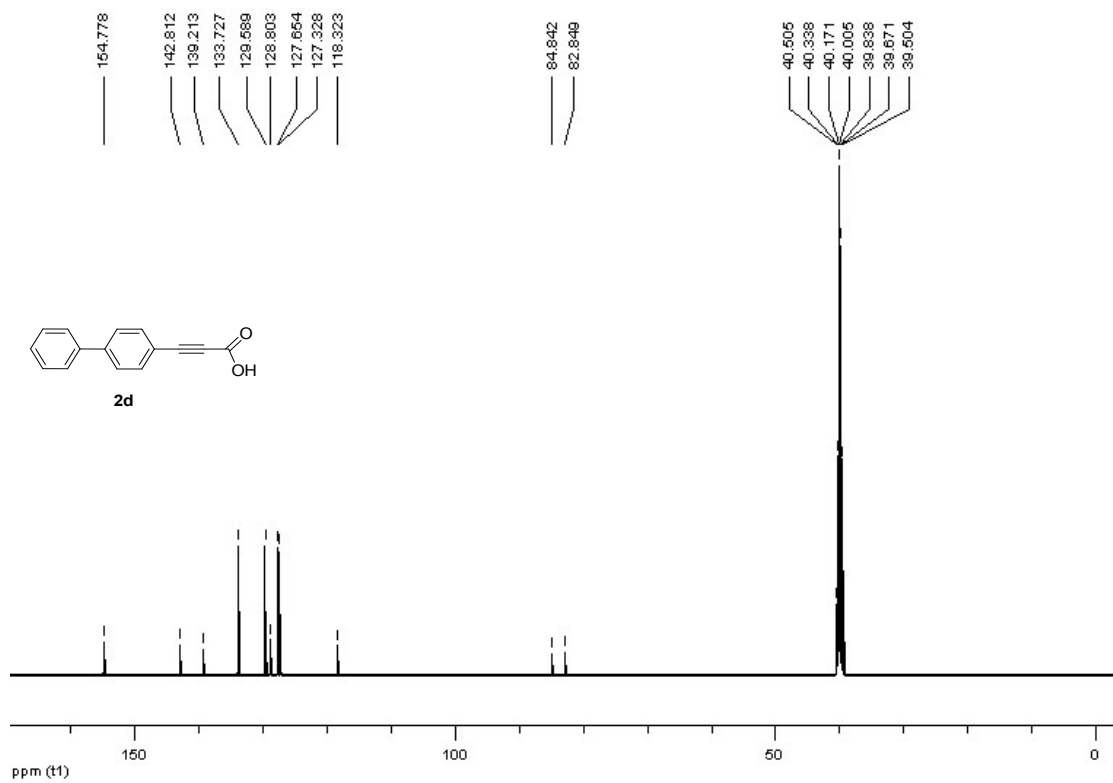

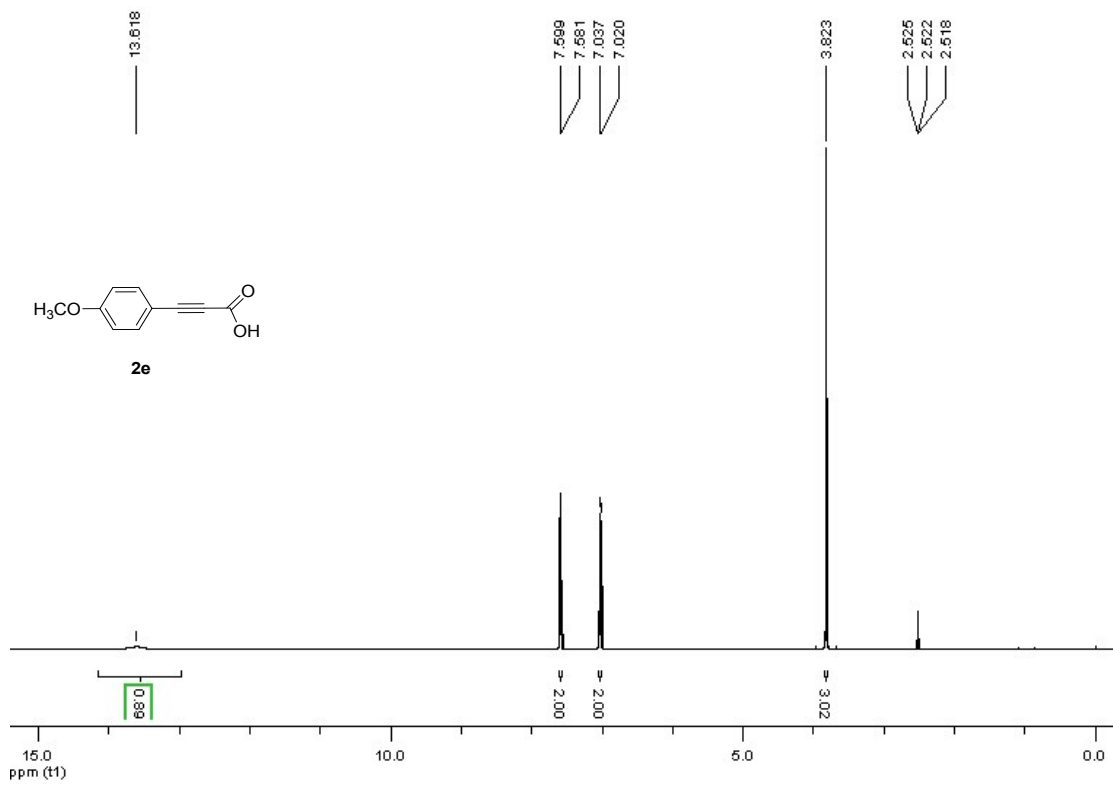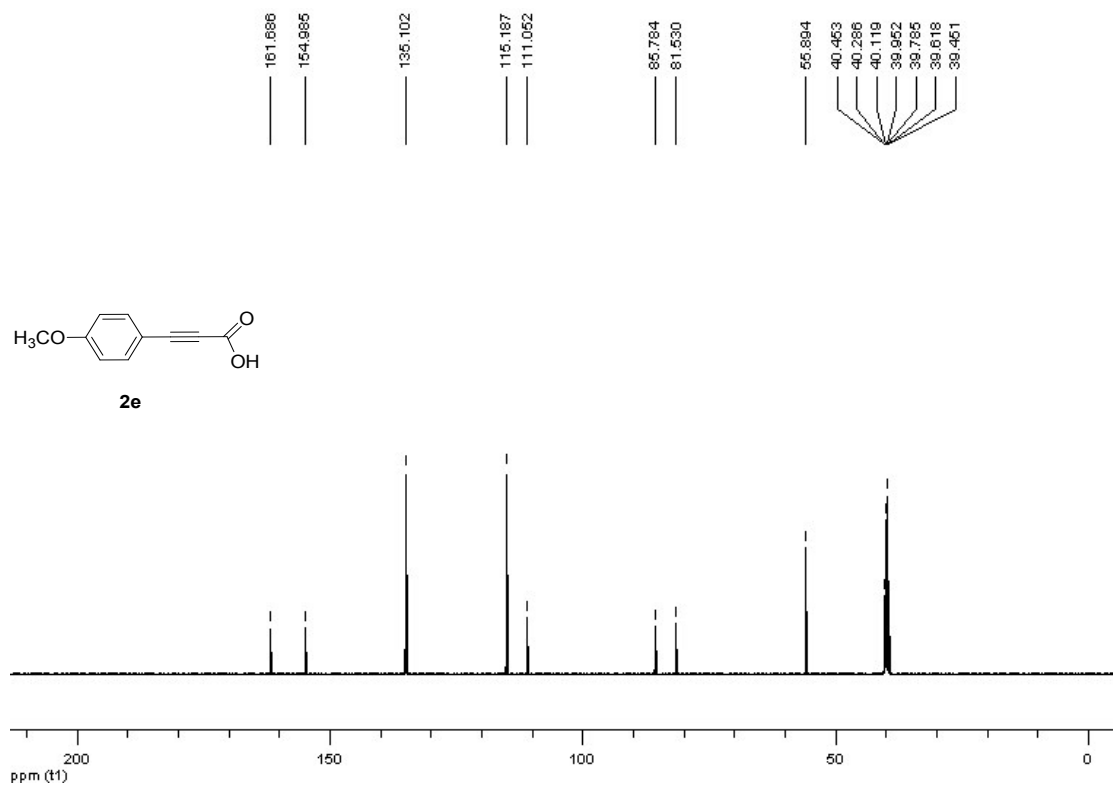

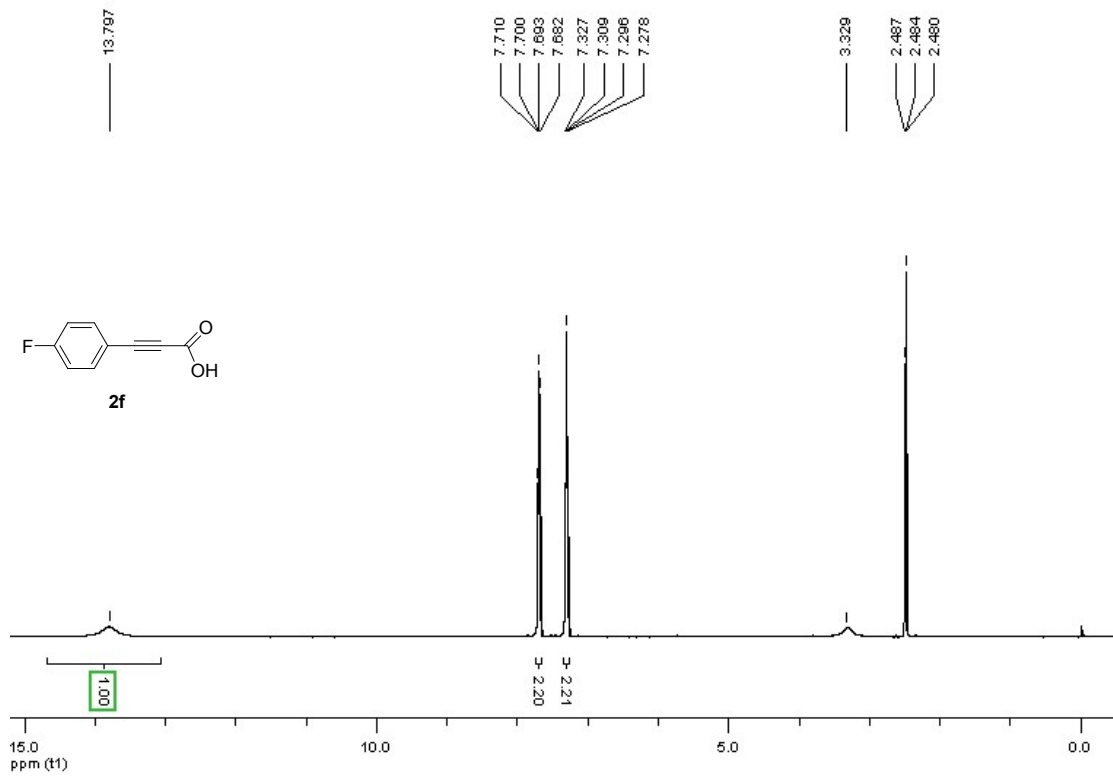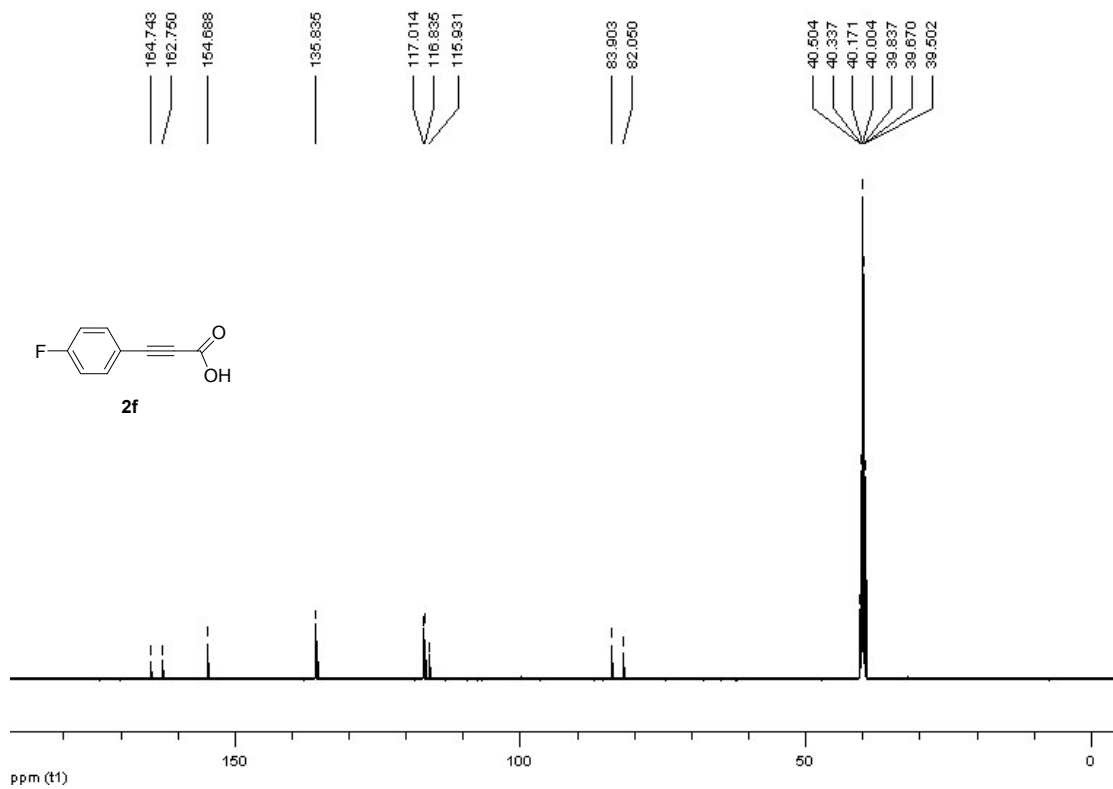

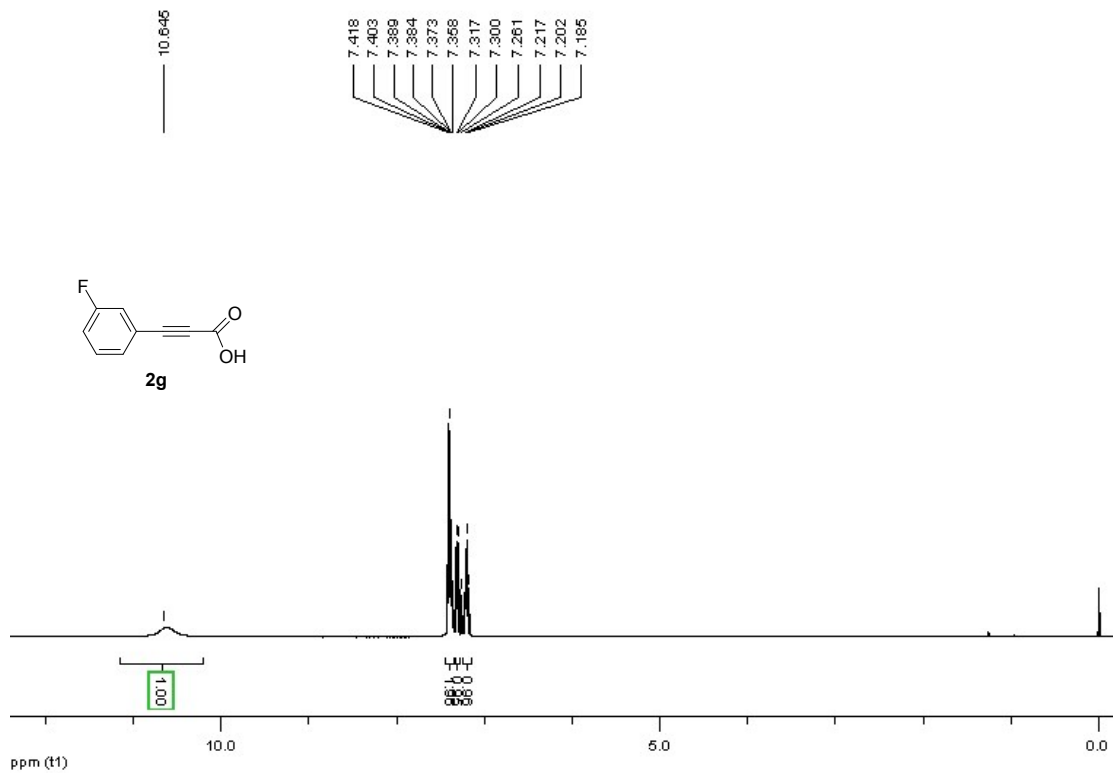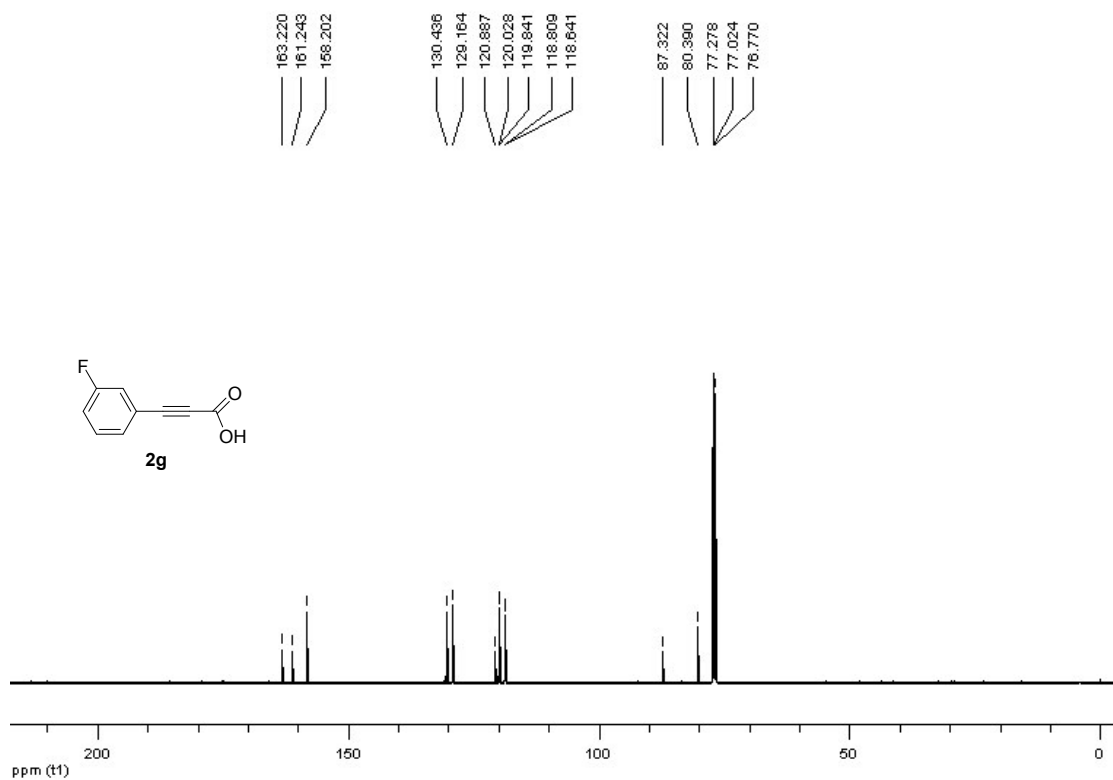

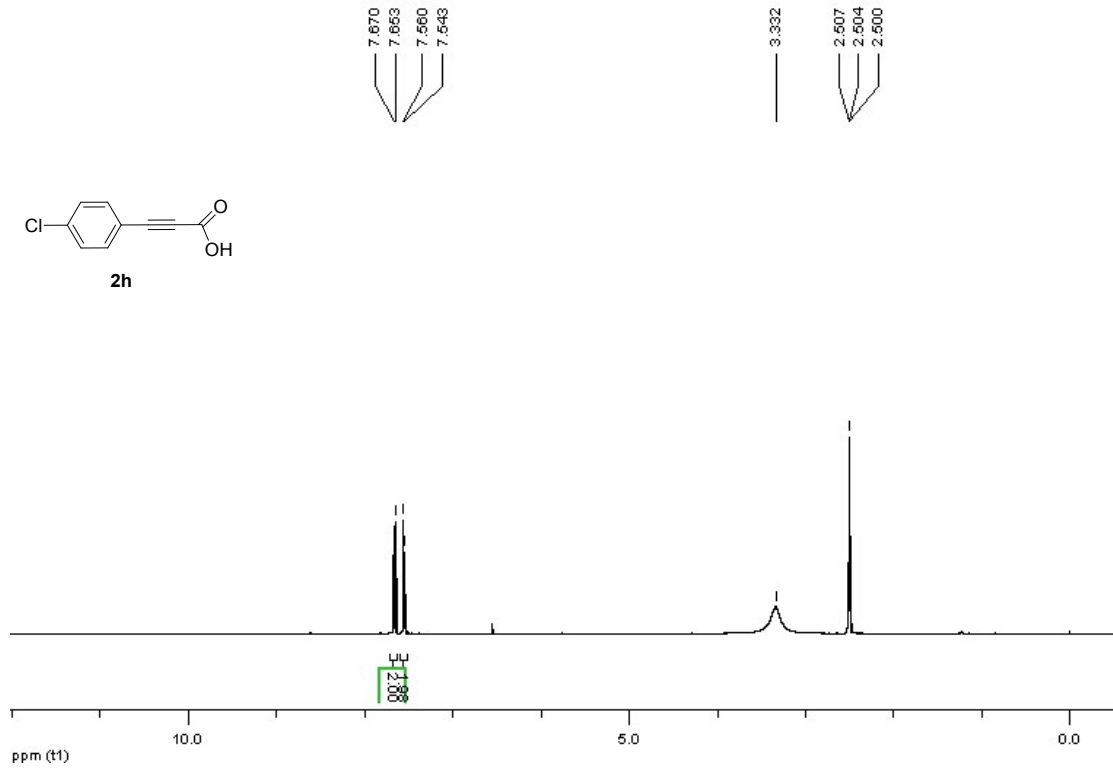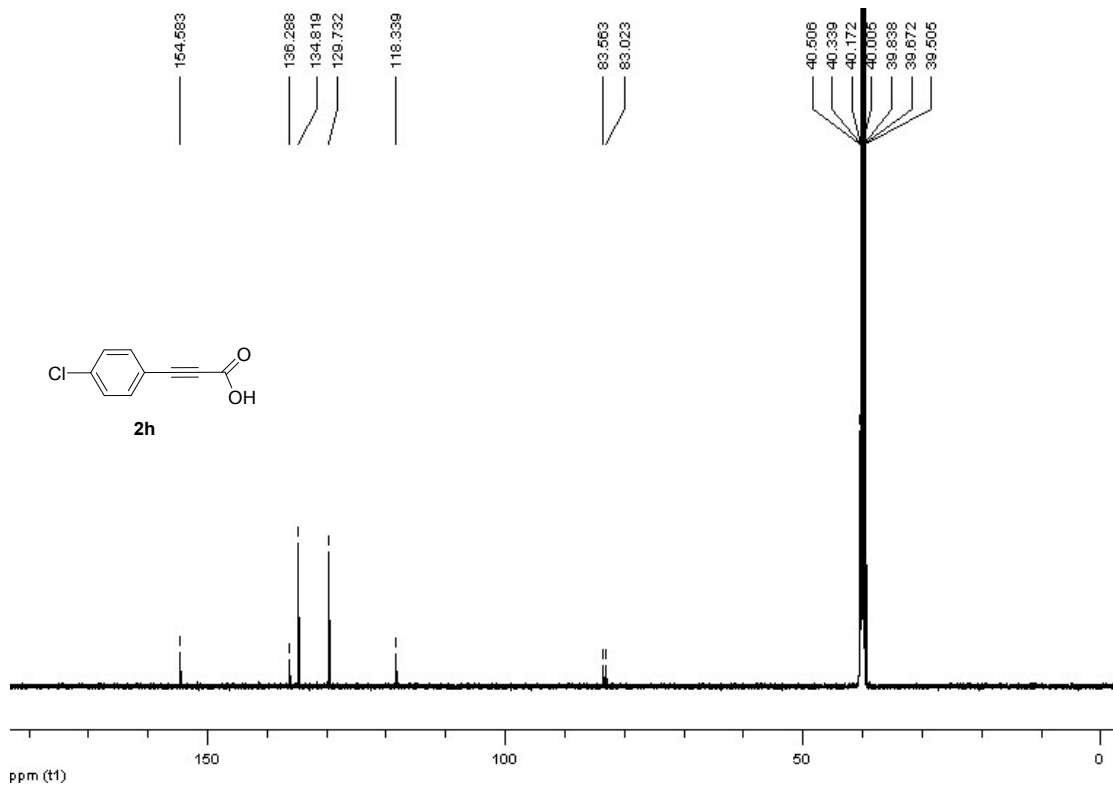

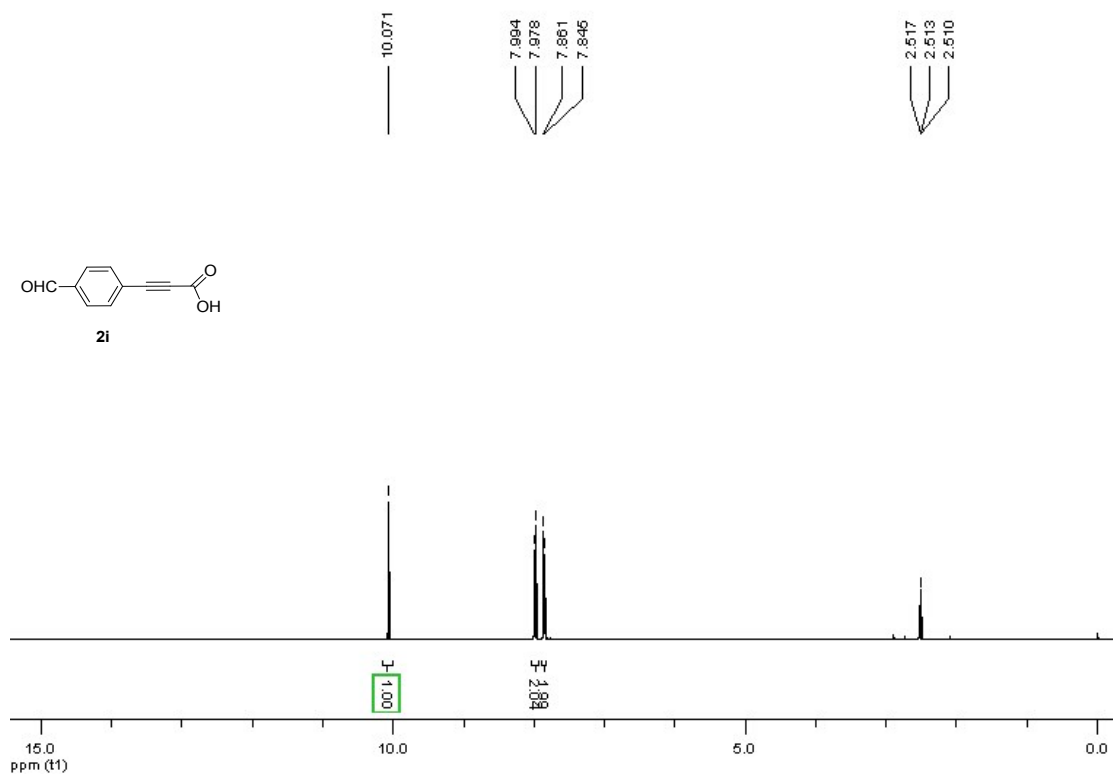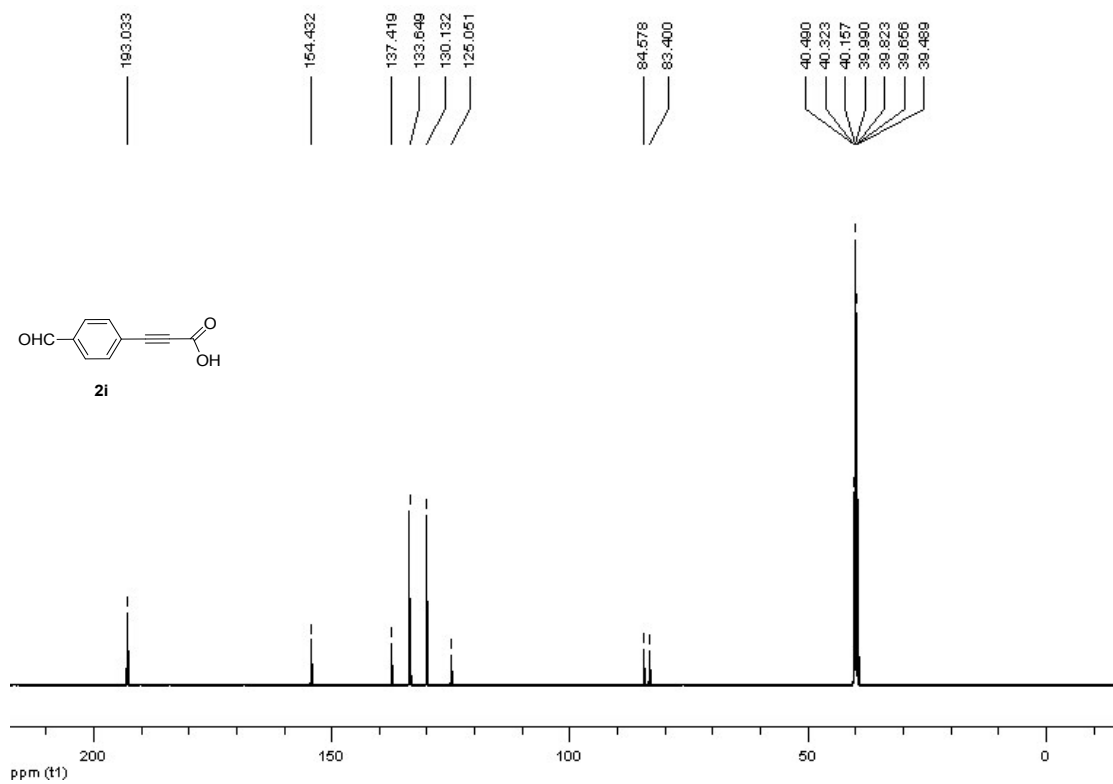



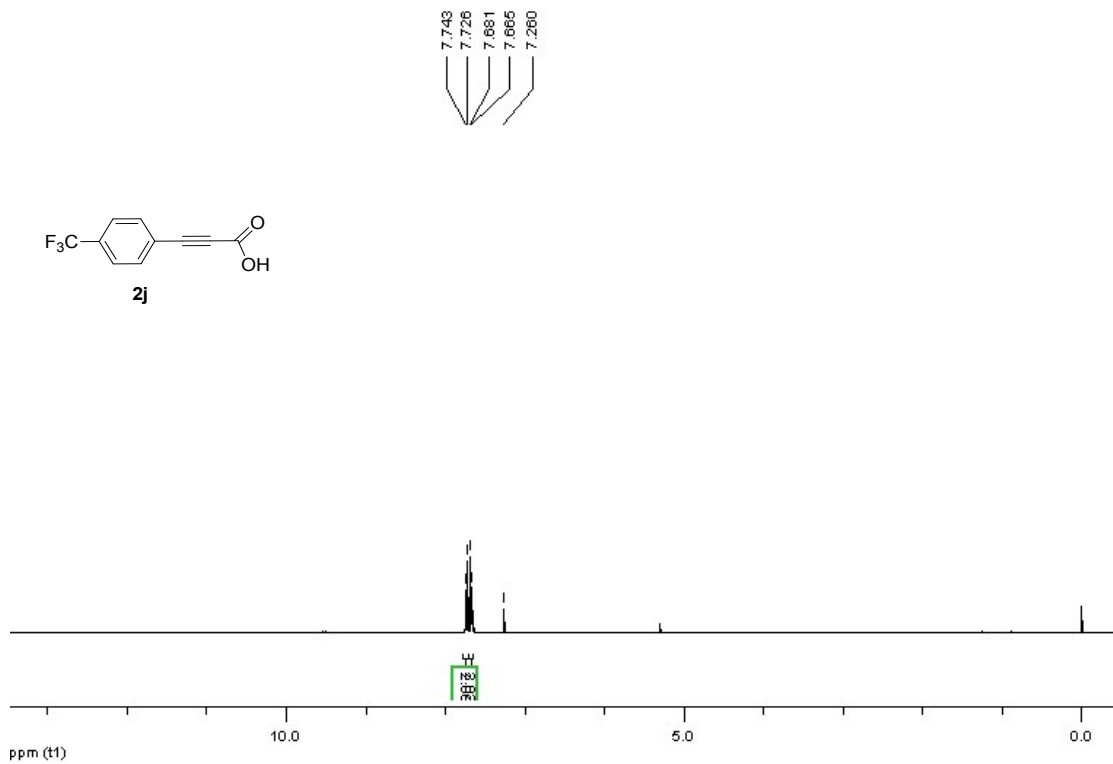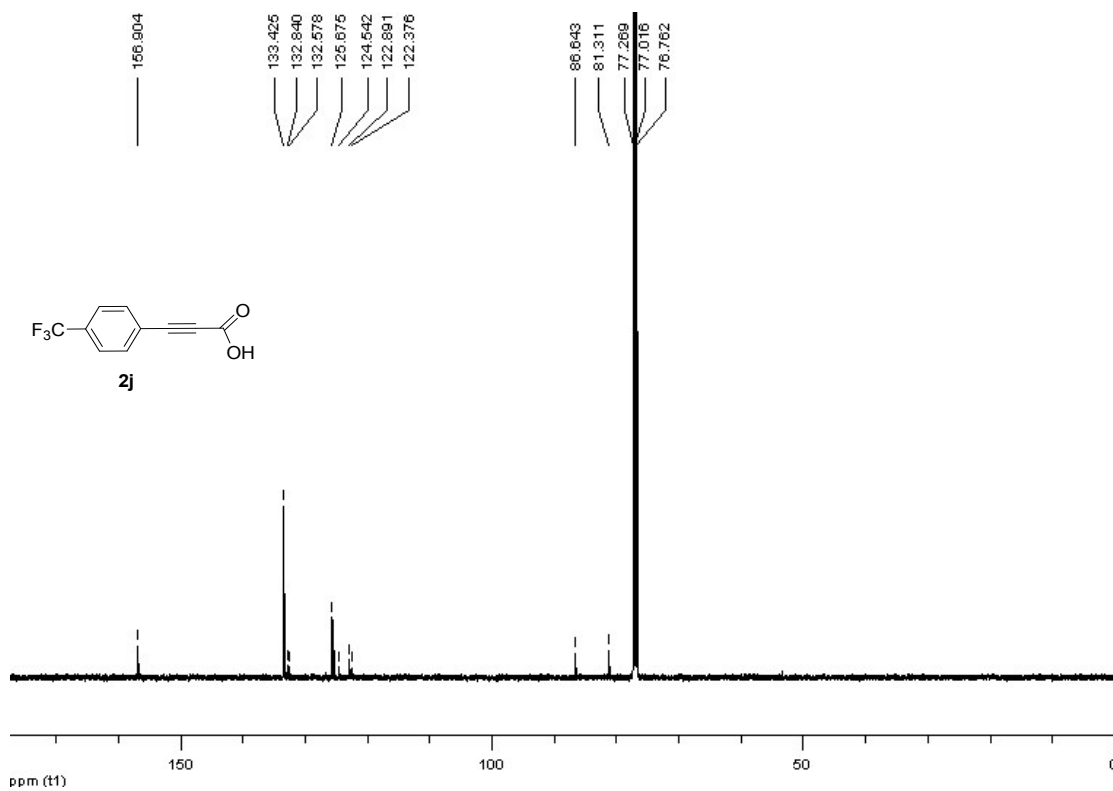

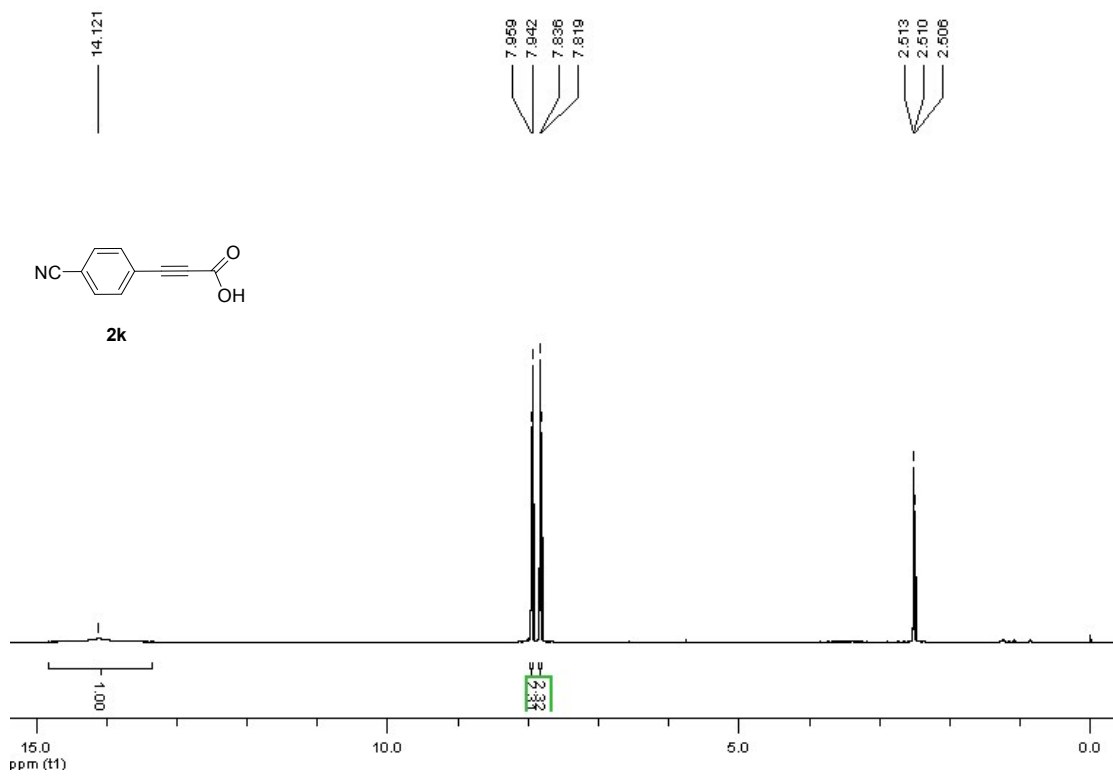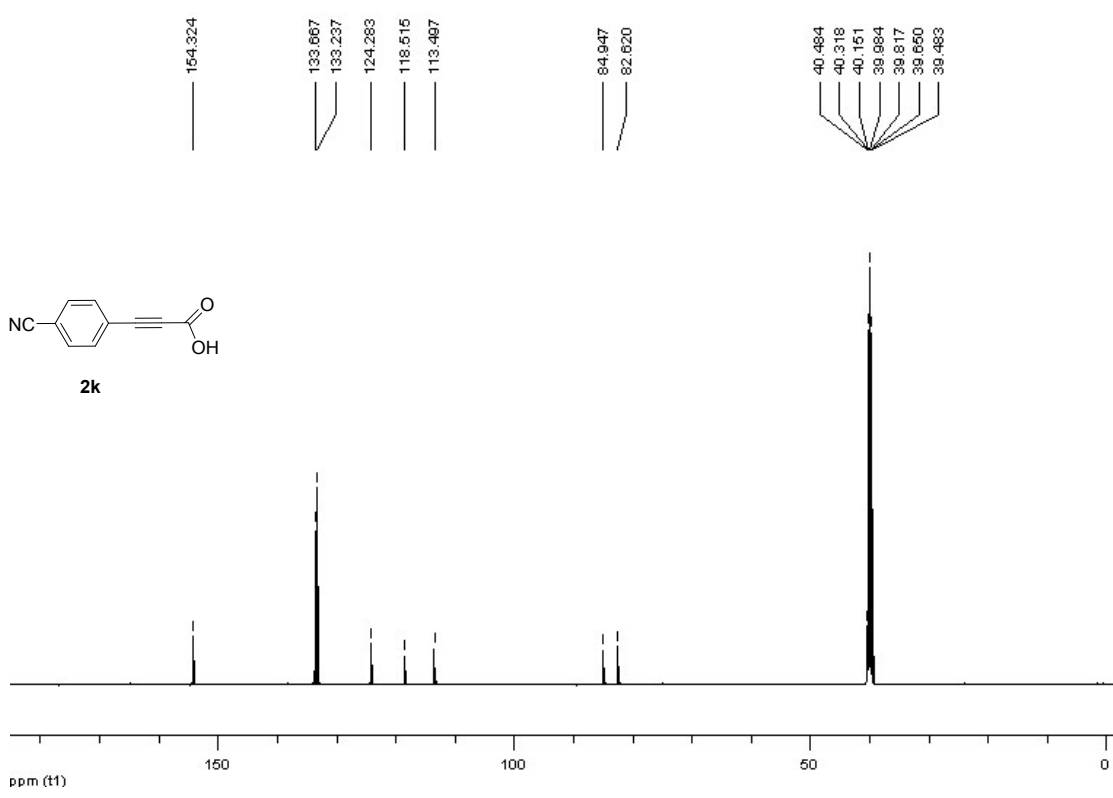

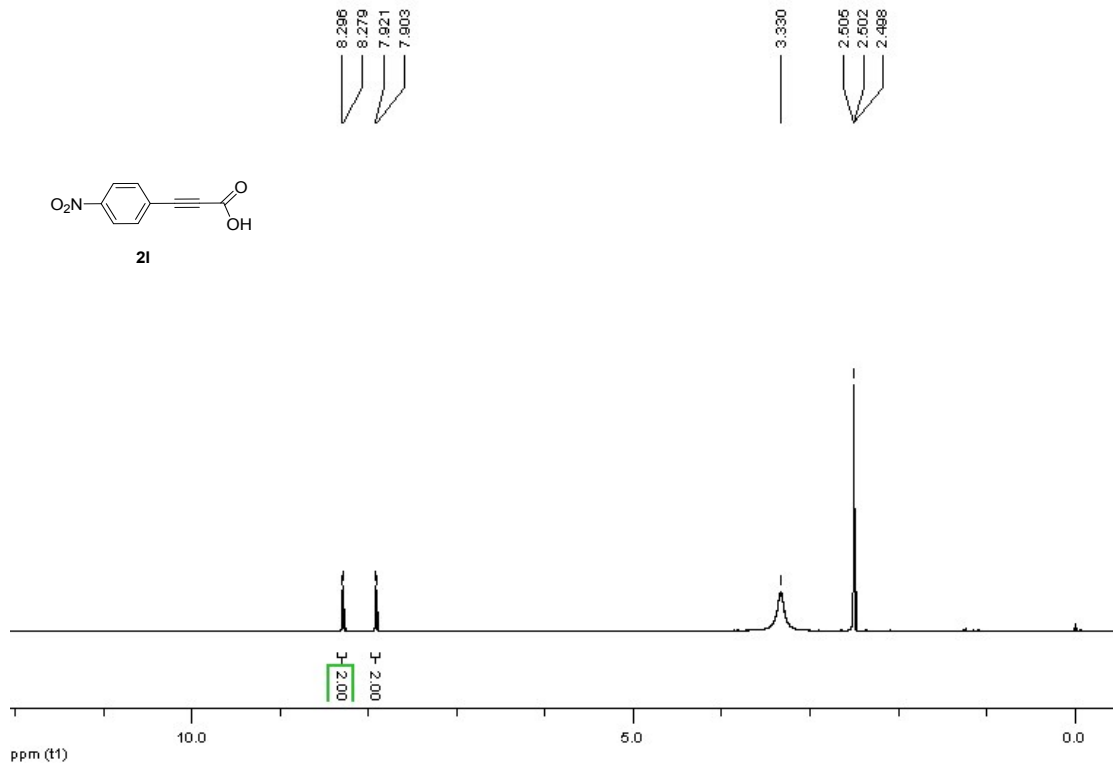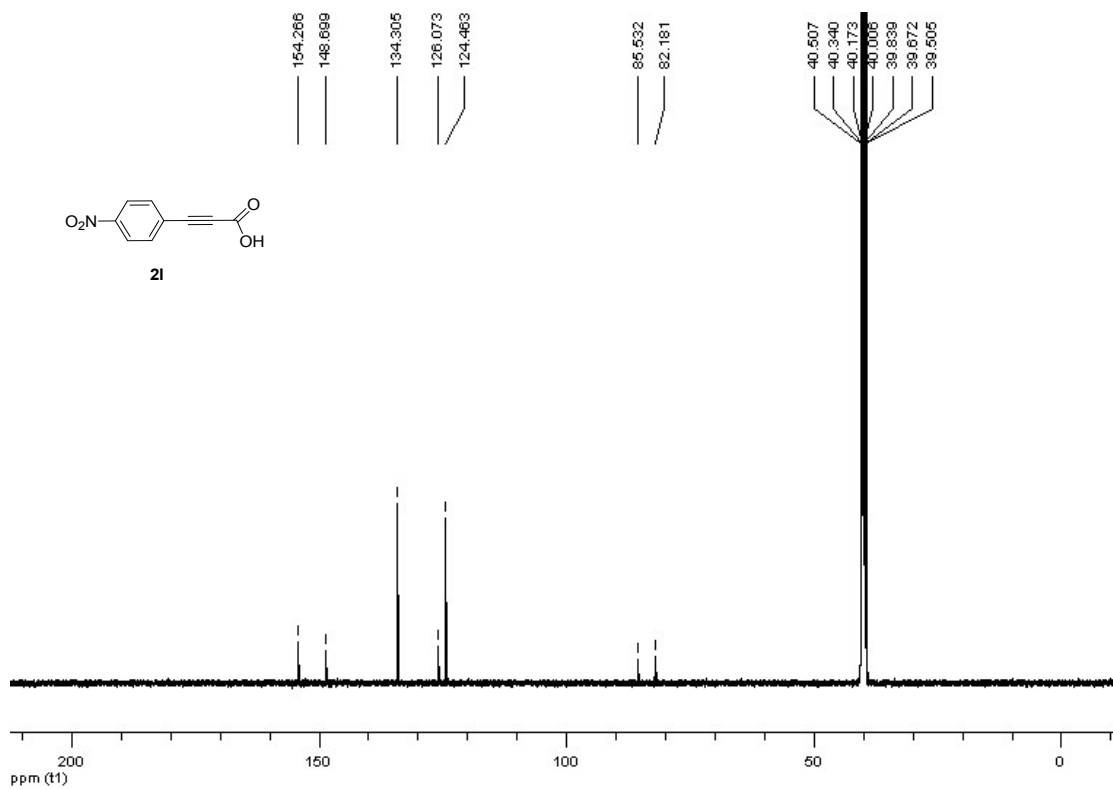

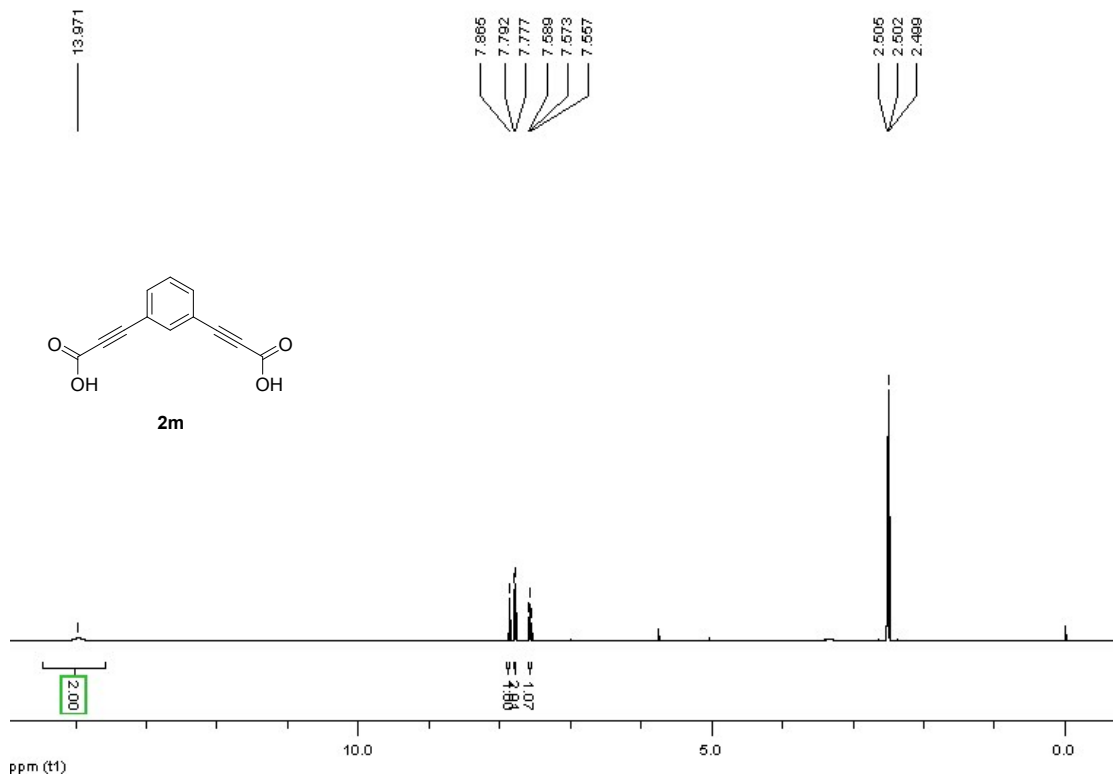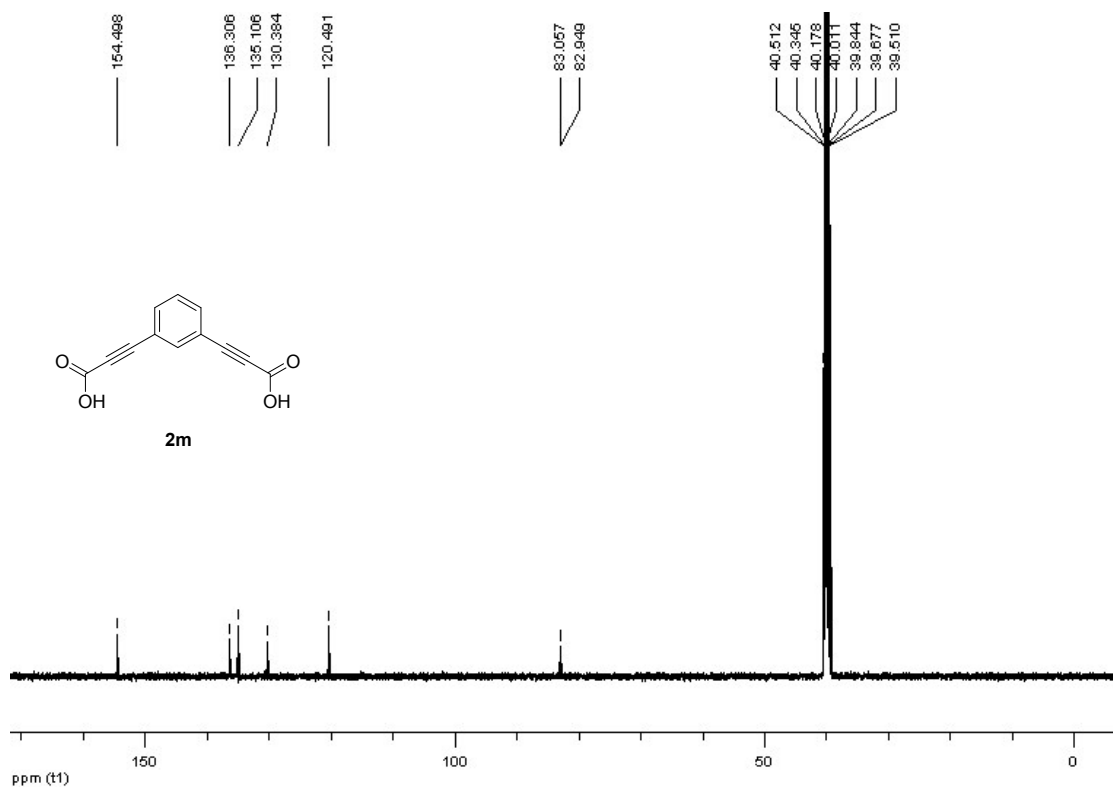

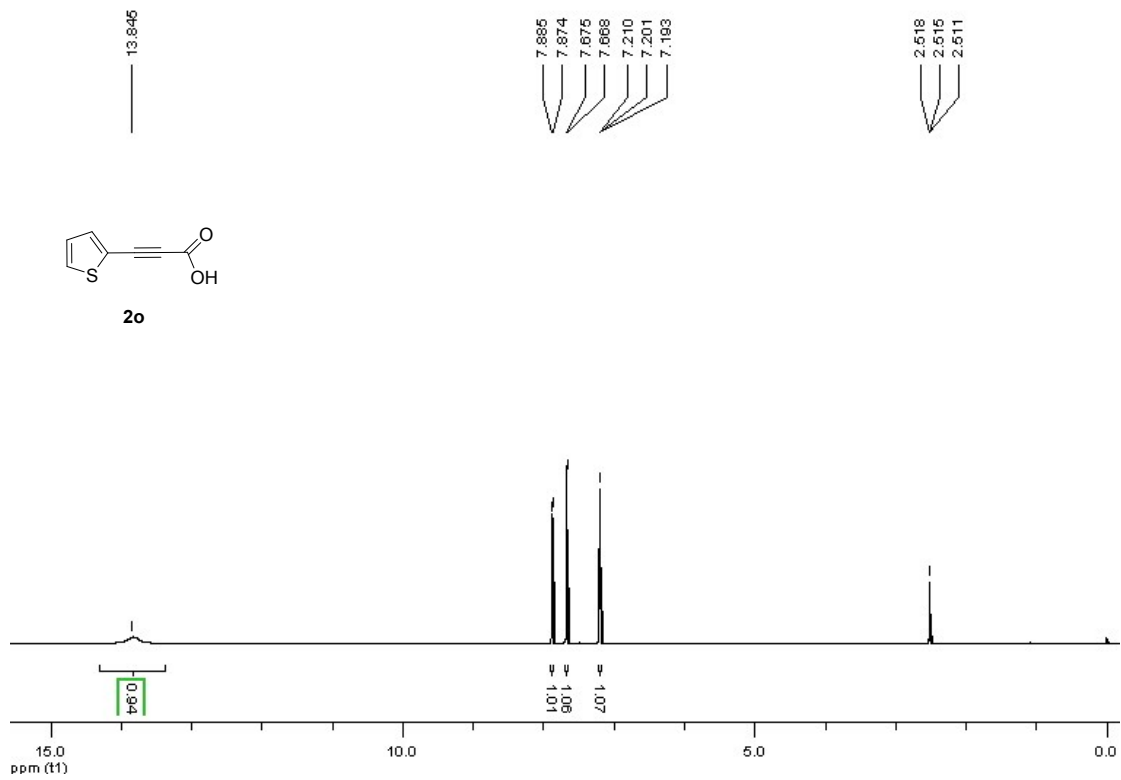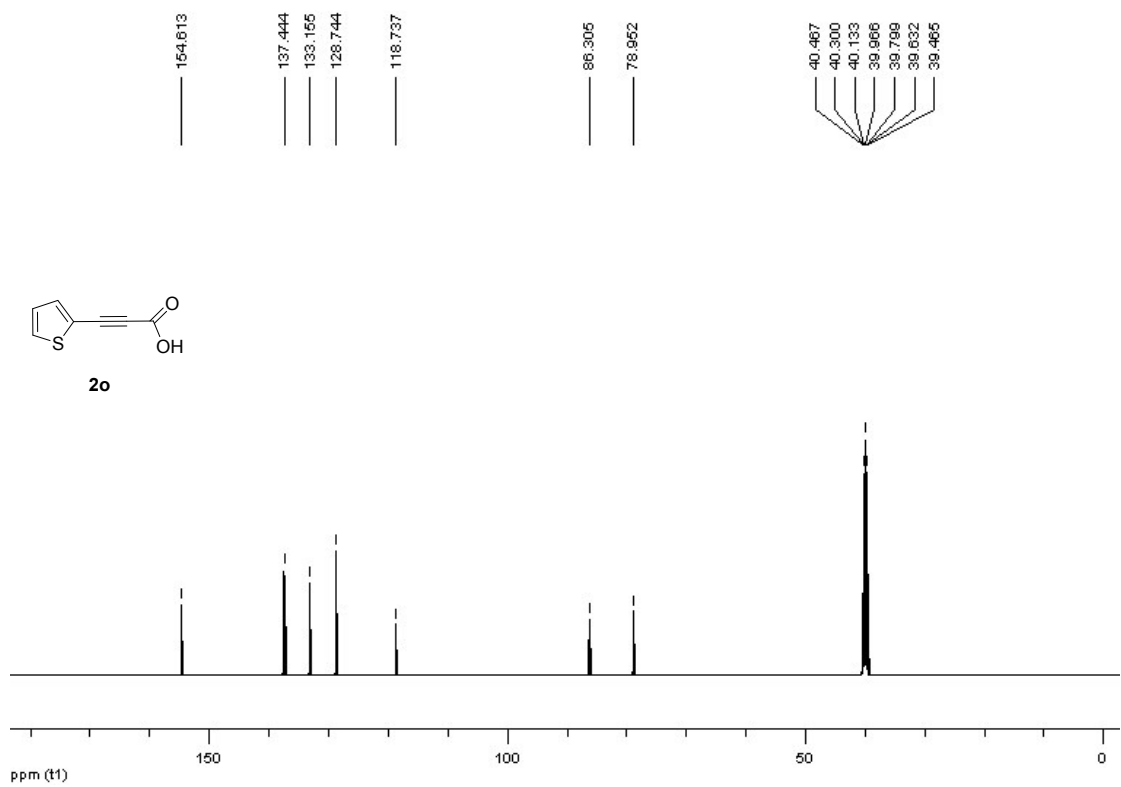

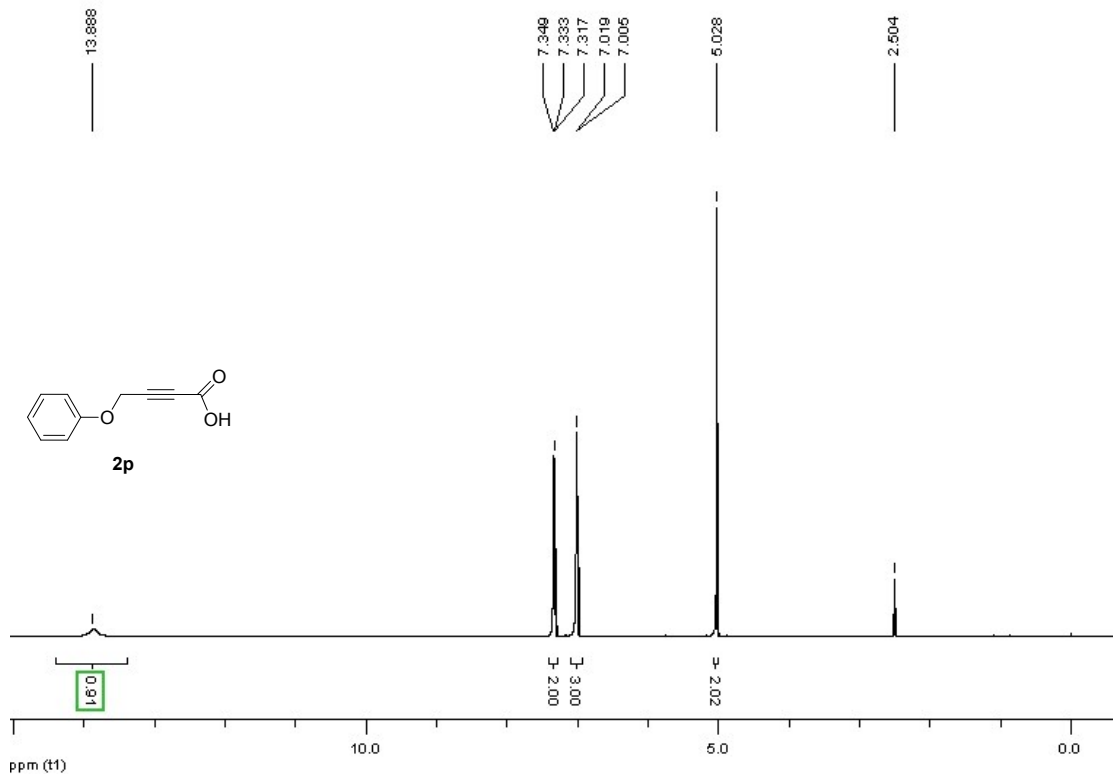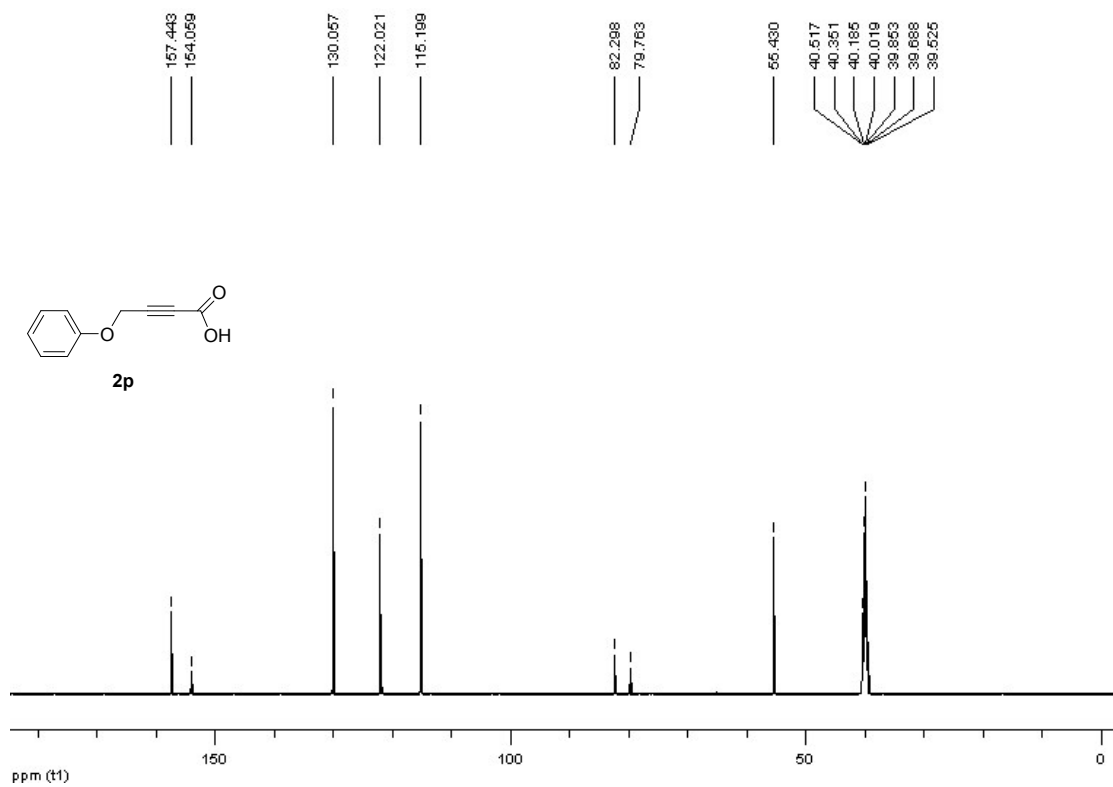

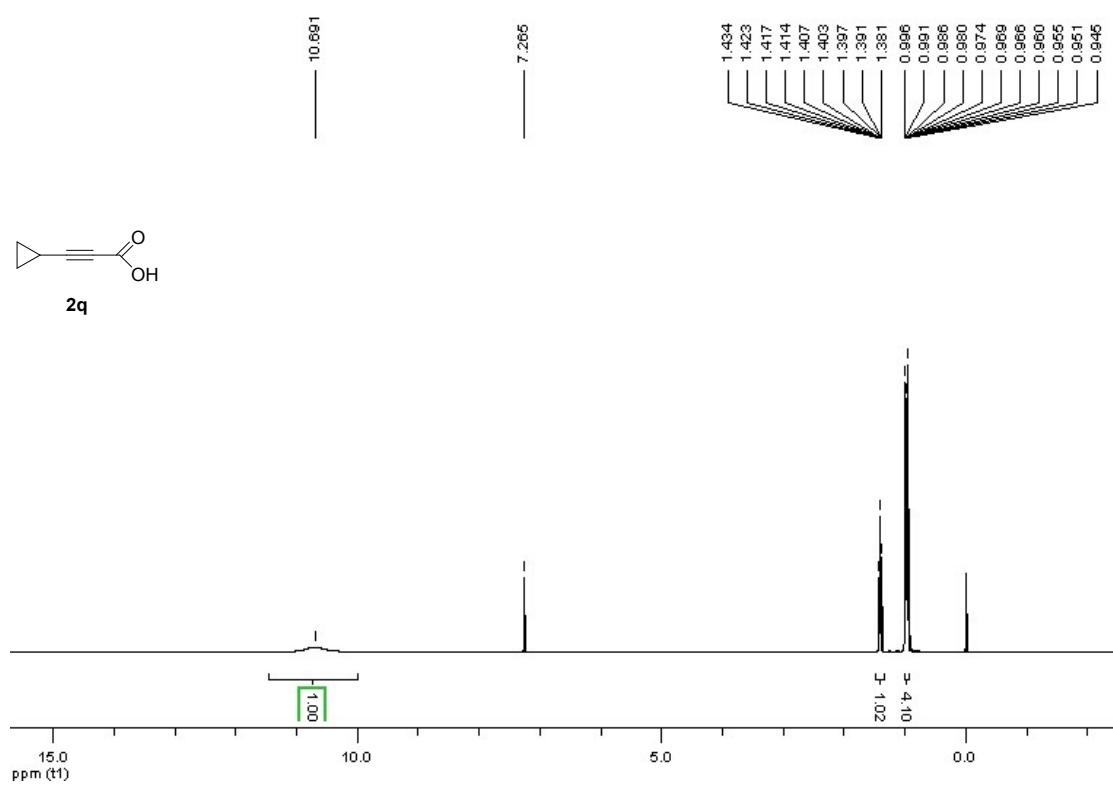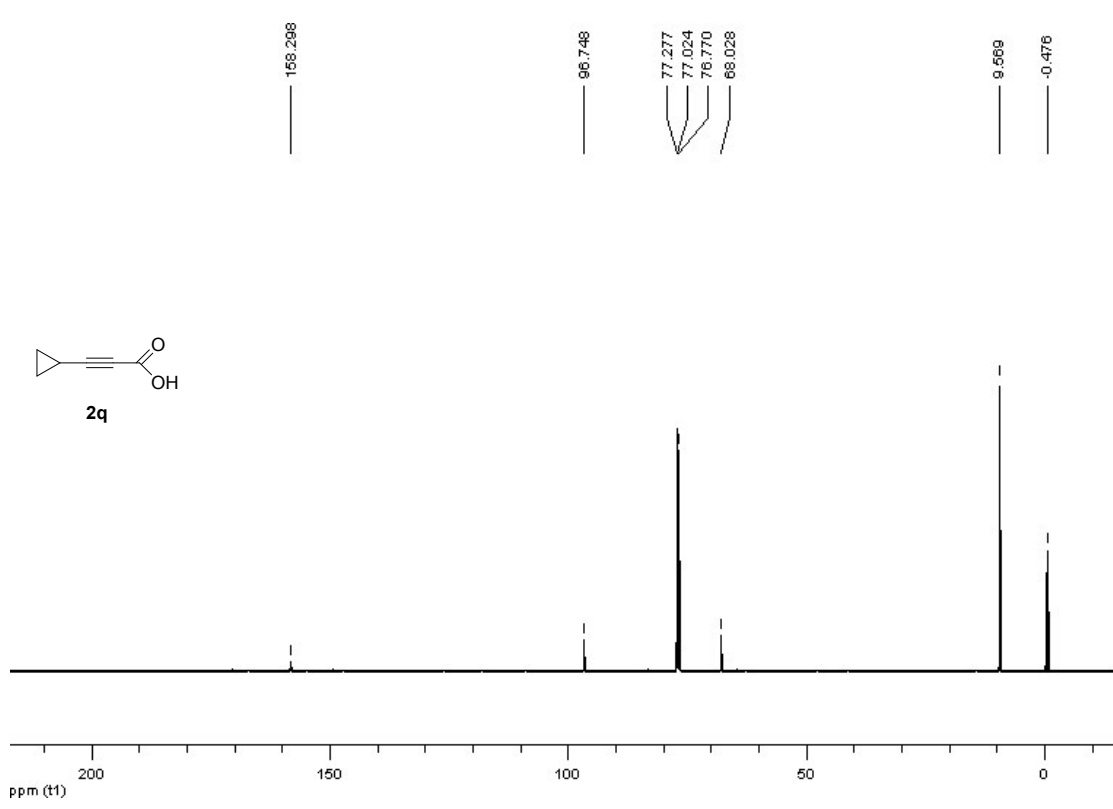

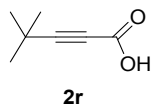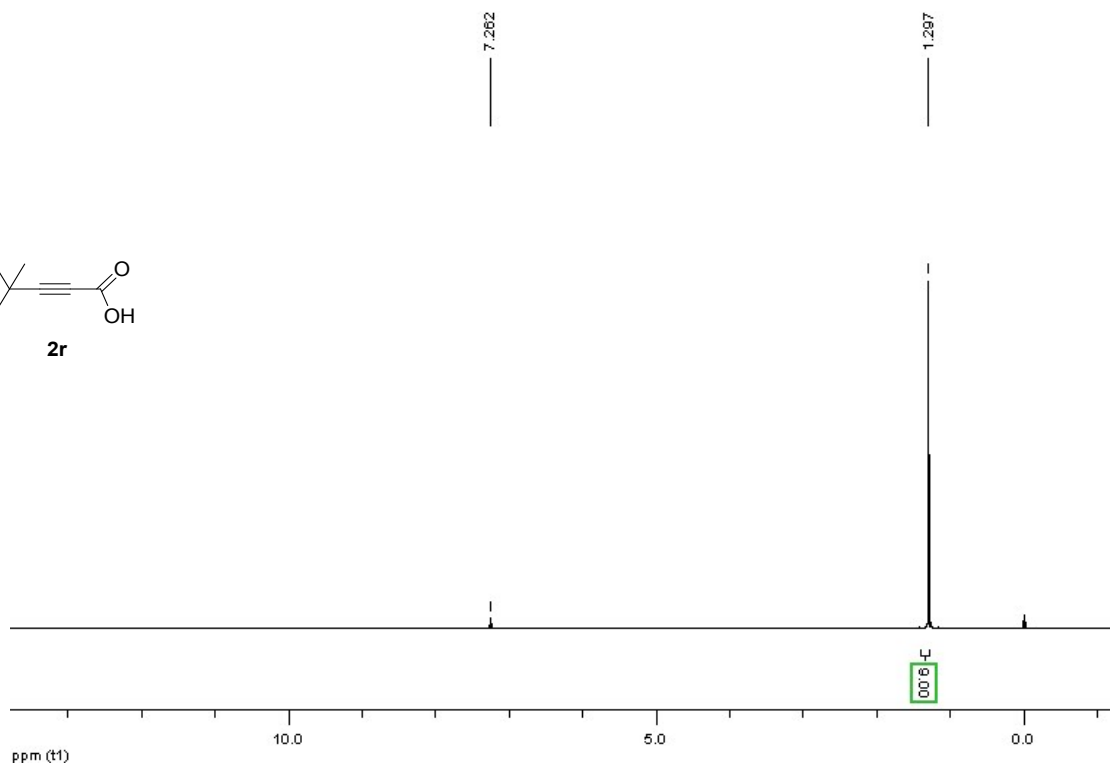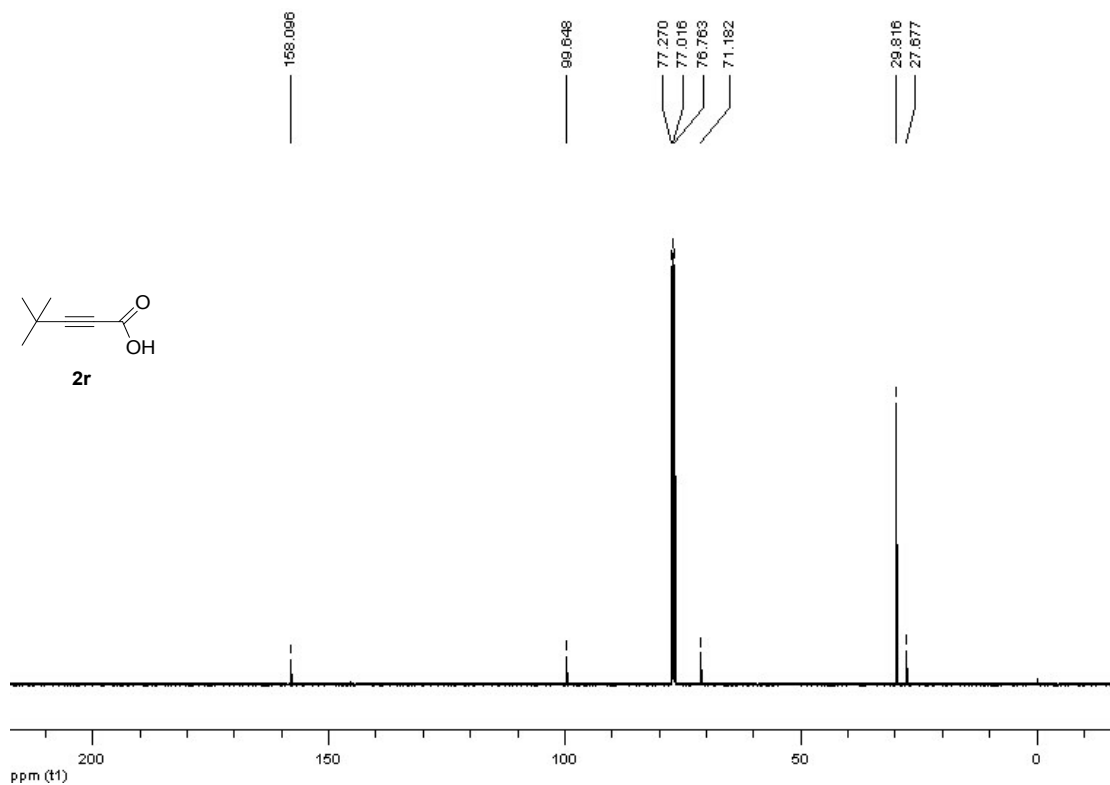



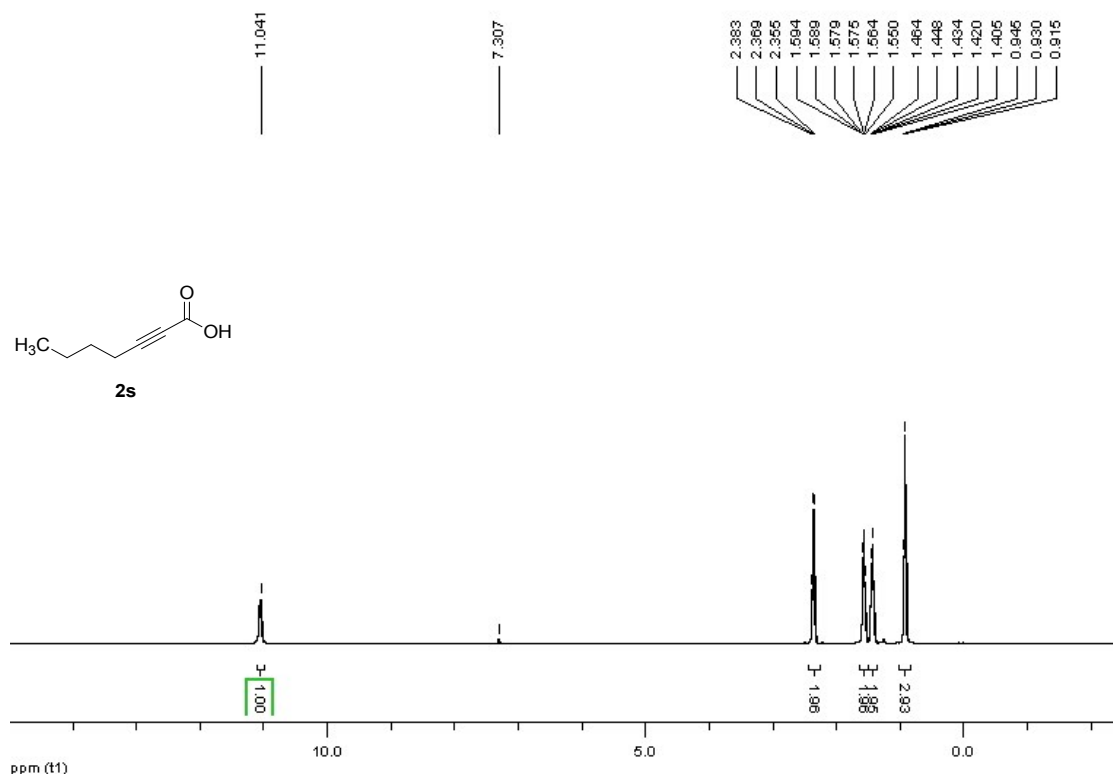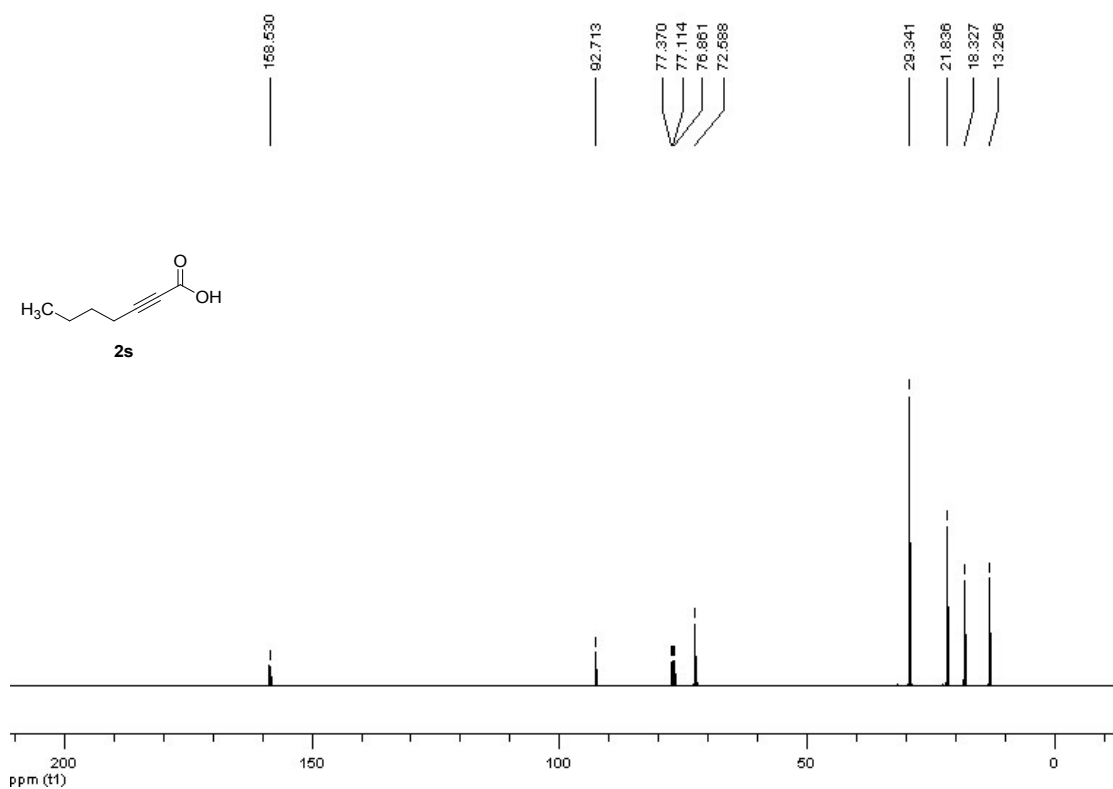

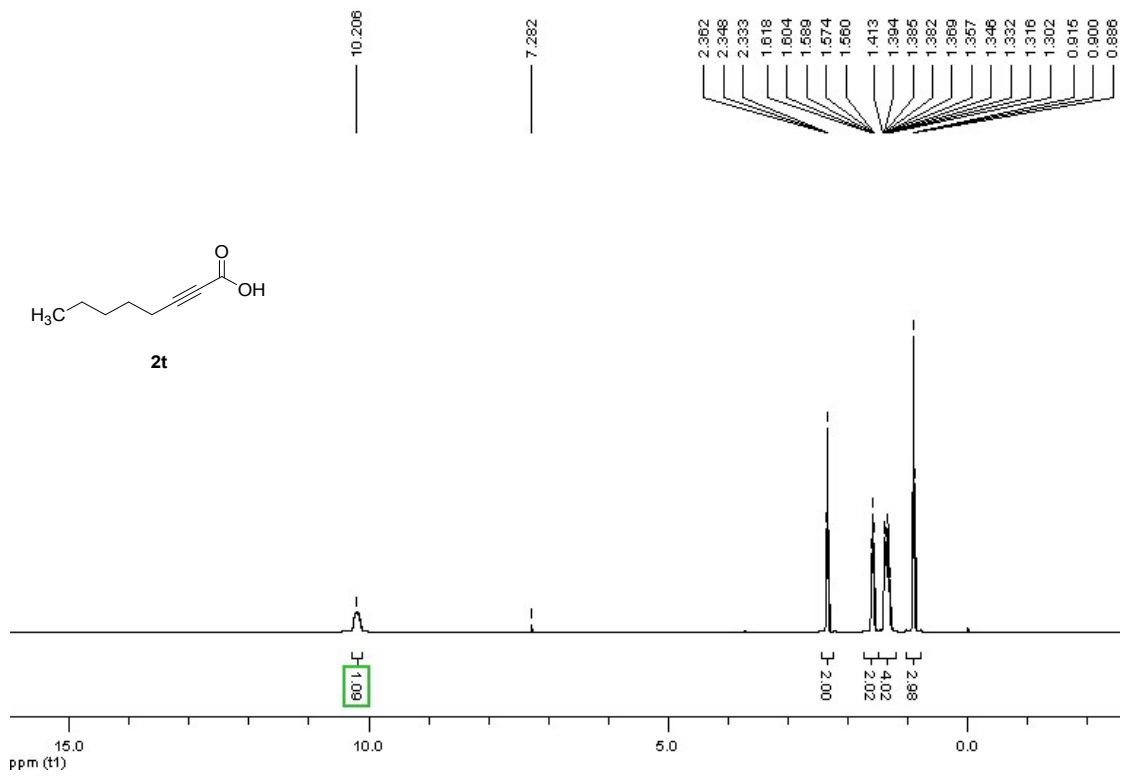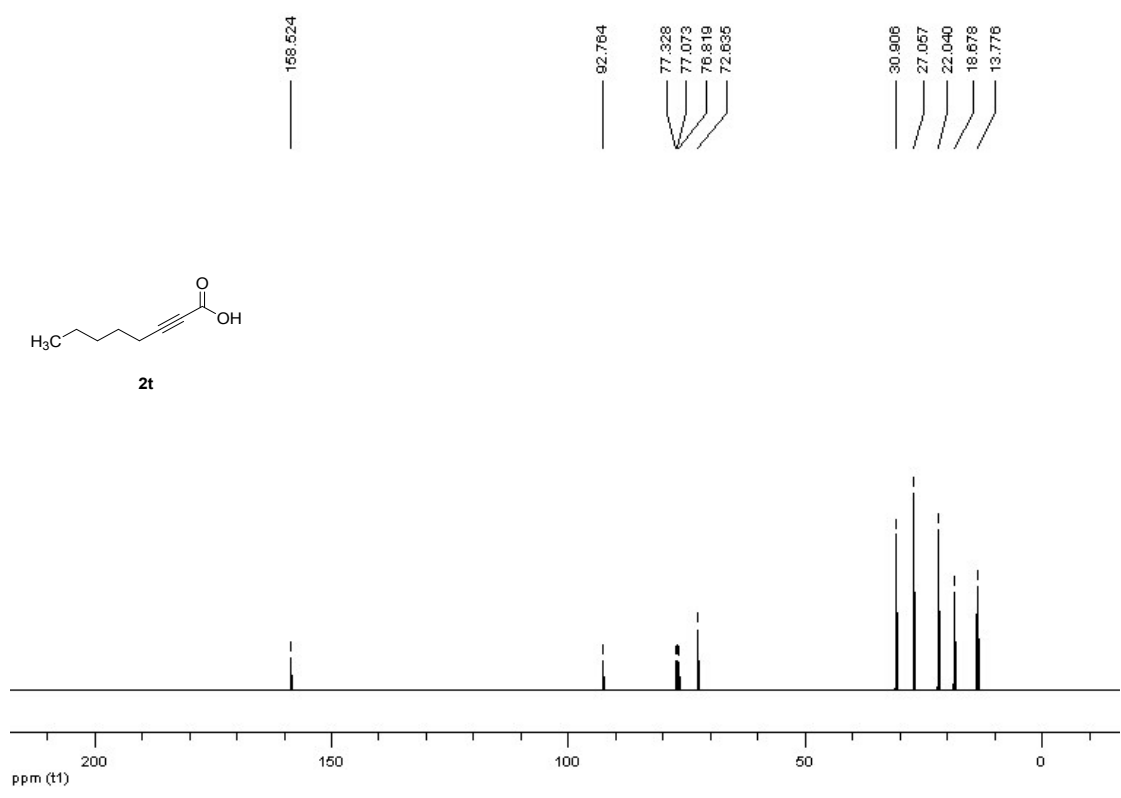

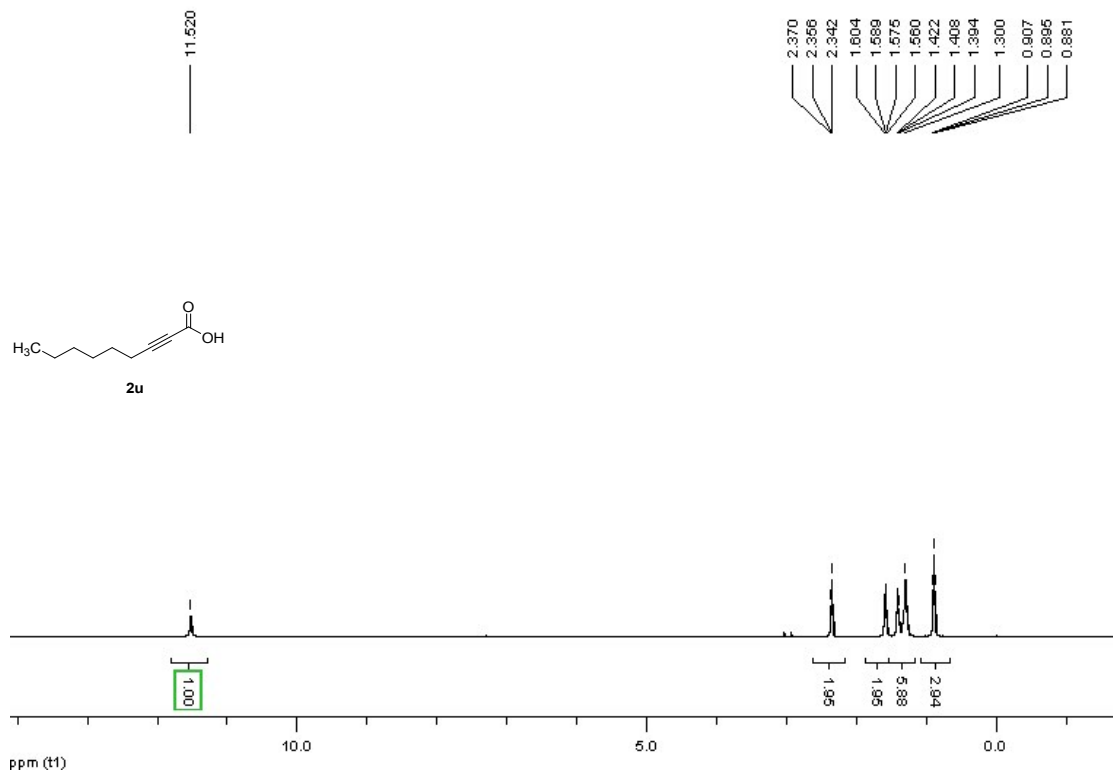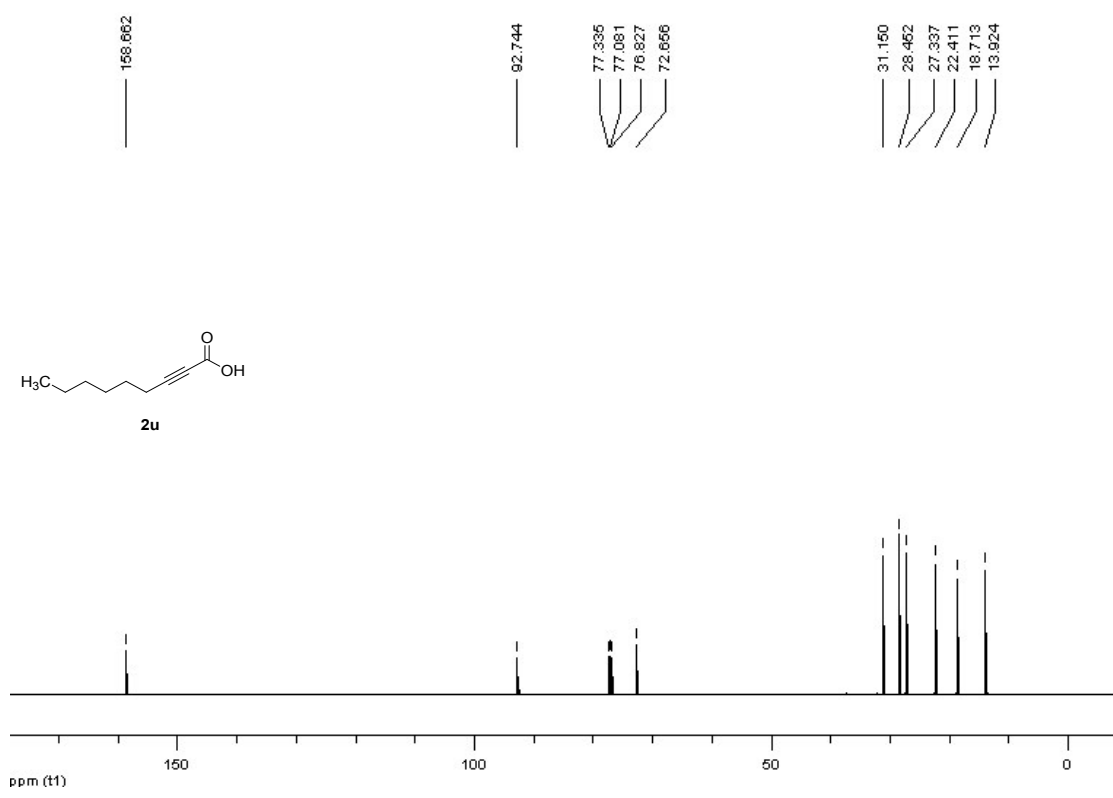

Supplement: c6dt01746k1.pdf [file c6dt01746k1.pdf]
